1 **An epigenetic switch regulates the ontogeny of AXL-positive/EGFR-TKI resistant cells by**  
2 **modulating miR-335 expression.**

3

4 Debjani Pal<sup>1,2†</sup>, Polona Safaric Tepes<sup>1,3†</sup>, Trine Lindsted<sup>1</sup>, Ingrid Ibarra<sup>1</sup>, Amaja Lujambio<sup>5</sup>, Vilma  
5 Jimenez Sabinina<sup>1</sup>, Serif Senturk<sup>1</sup>, Madison Miller<sup>1</sup>, Navya Korimerla<sup>1,4</sup>, Jiahao Huang<sup>1</sup>, Larry  
6 Glassman<sup>6</sup>, Paul Lee<sup>6</sup>, David Zeltsman<sup>6</sup>, Kevin Hyman<sup>6</sup>, Michael Esposito<sup>6</sup>, Gregory J. Hannon<sup>1,7</sup>,  
7 Raffaella Sordella<sup>1,8,\*</sup>

8

9 *1. Cold Spring Harbor Laboratory, 1 Bungtown Road, Cold Spring Harbor, NY 11724*

10 *2. Graduate Program in Molecular and Cellular Biology, Stony Brook University, Stony Brook,*  
11 *NY 11794*

12 *3. Faculty of Pharmacy University of Ljubljana, Askerceva cesta 7, 1000 Ljubljana, Slovenia*

13 *4. Graduate Program in Biomedical Engineering, Stony Brook University, Stony Brook, NY 11794*

14 *5. Icahn School of Medicine at Mount Sinai, Hess Center for Science and Medicine, New York, NY*  
15 *10029*

16 *6. Northwell Health Long Island, Jewish Medical Center, 270-05, 76<sup>th</sup> Avenue, Queens, NY 11040*

17 *7. Cancer Research UK – Cambridge Institute, University of Cambridge, Cambridge, UK*

18 *8. Watson School of Biological Sciences, Cold Spring Harbor Laboratory, Cold Spring Harbor,*  
19 *NY 11724*

20 *\*Corresponding Author*

21 *†These authors contributed equally to this work.*

22 **ABSTRACT**

23

24 Lung cancer remains the leading cause of cancer-related mortality worldwide, despite current  
25 advancements in research and therapeutics. Many patients diagnosed with lung cancer will  
26 develop resistance to chemotherapeutic agents. In the context of non-small cell lung cancers  
27 (NSCLC) harboring EGFR oncogenic mutations, augmented levels of AXL and GAS6 have been  
28 found to drive Erlotinib resistance in certain tumors with mesenchymal-like features. By  
29 studying the ontogeny of AXL-positive cells, we have identified a novel non-genetic mechanism  
30 of drug resistance based on cell-state transition. We demonstrate that AXL-positive cells are  
31 already present as a sub-population of cancer cells in Erlotinib-naïve tumors and tumor-derived  
32 cell lines, and that the expression of AXL is regulated through a stochastic mechanism centered  
33 on the epigenetic regulation of miR-335. The existence of a cell-intrinsic program through which  
34 AXL-positive/Erlotinib-resistant cells emerge infers the need of treating tumors harboring EGFR-  
35 oncogenic mutations upfront with combinatorial treatments targeting both AXL-negative and  
36 AXL-positive cancer cells.

37

## 38 INTRODUCTION

39

40 Each year, more than a million patients worldwide are diagnosed with non–small cell lung cancer  
41 (NSCLC) (Brose, Volpe et al. 2002, Samuels, Wang et al. 2004, Stephens, Hunter et al. 2004,  
42 Haber, Bell et al. 2005, Bean, Brennan et al. 2007, Pillai and Ramalingam 2012). In 2014, the  
43 discovery that EGFR-oncogenic mutations were present in 15-30% of NSCLC patients and that the  
44 vast majority of patients harboring such mutations are particularly sensitive to treatment with EGFR  
45 inhibitors (TKi) such as Erlotinib and Gefitinib was a critical breakthrough.(Lynch, Bell et al. 2004,  
46 Paez, Janne et al. 2004). The identification of these actionable EGFR-oncogenic mutations  
47 revolutionized the management of NSCLC tumors from a predominantly clinic-pathologic to a  
48 genotype-directed classification and therapeutic approach. Yet, the success of this biomarker-based  
49 targeted therapy has been hampered by the occurrence of drug resistance. In fact, within a year of  
50 treatment with EGFR TKIs, almost all patients experience relapse (Bell, Gore et al. 2005).

51

52 The past 10 years have seen tremendous progress in our understanding of the multiple mechanisms  
53 that lead to acquired resistance against TKIs. Using both experimental systems and patient samples,  
54 secondary/gatekeeper mutations in *EGFR* (T790M), c-Met amplifications, *PI3K* mutations, and the  
55 acquisition of mesenchymal and small-cell lung cancer features have been identified and validated  
56 as molecular determinants of EGFR TKi resistance (Bell, Gore et al. 2005, Engelman, Mukohara  
57 et al. 2006, Shaw, Yeap et al. 2009, Yao, Fenoglio et al. 2010, Shaw and Engelman 2016). More  
58 recently, the expression of AXL has also been reported as an additional mechanism of acquired  
59 resistance in EGFR TKi resistant tumors with mesenchymal- like features (Zhang, Lee et al. 2012,  
60 Byers, Diao et al. 2013, Walter, Sjin et al. 2013, Elkabets, Pazarentzos et al. 2015).

61

62 AXL is a member of the TAM (Tyro-AXL-Mer) receptor tyrosine kinase family. These receptors  
63 regulate a variety of cellular responses including cell survival, proliferation, motility, as well as  
64 differentiation (Zhang, Knyazev et al. 2008, Ghosh, Secreto et al. 2011, Ben-Batalla, Schultze et  
65 al. 2013). AXL is expressed in many embryonic tissues and participates in mesenchymal and  
66 neuronal development. In adult tissue its expression is usually restricted to smooth muscle cells but  
67 it has been observed to be overexpressed in several human tumors of different tissue origins.  
68 (Zhang, Knyazev et al. 2008, Ghosh, Secreto et al. 2011, Ben-Batalla, Schultze et al. 2013).

69

70 AXL possesses an extracellular domain with two N-terminal immunoglobulin (Ig)-like domains  
71 and two fibronectin type III (FNIII) repeats that bind to the growth-arrest-specific 6 (GAS6) ligand

72 (O'Bryan, Frye et al. 1991, Mark, Chen et al. 1996, Nagata, Ohashi et al. 1996). The binding of  
73 AXL to GAS6 --upon its paracrine or autocrine secretion-- enables the trans-auto-phosphorylation  
74 of AXL's intracellular tyrosine kinase domain and, consequently, the activation of multiple down-  
75 stream signaling cascades (Braunger, Schleithoff et al. 1997, Prasad, Rothlin et al. 2006).

76

77 In the context of NSCLC, higher levels of AXL and GAS6 have been observed in tumors that  
78 developed resistance to Erlotinib (Zhang, Lee et al. 2012, Byers, Diao et al. 2013). In these tumors,  
79 targeting AXL by either chemical or genetic inhibition restored Erlotinib sensitivity. Alternatively,  
80 forced expression of an active AXL kinase in Erlotinib-sensitive tumor cells was sufficient to  
81 induce Erlotinib resistance (Zhang, Lee et al. 2012).

82

83 Despite these documented findings, the molecular mechanisms leading to the ontogeny of AXL-  
84 positive cells remains poorly understood. Unlike other receptor tyrosine kinases, no mutations or  
85 amplifications of the AXL locus have been described in AXL-positive/Erlotinib-resistant cells  
86 (Wu, Liu et al. 2014).

87

88 Here, we demonstrate that AXL-positive cells are already present in Erlotinib-naïve tumors and  
89 that they are generated via an epigenetic/stochastic mechanism. Consistent with this model, we  
90 found that the transition between AXL-positive and AXL-negative cells is highly plastic.

91

92 This mechanism conceptually differs from previously described models of acquired or adaptive  
93 resistance based on the acquisition of secondary mutations, or drug-driven rewiring of signaling  
94 networks. In fact, the generation of AXL-positive cells is neither generated via genetic mutations,  
95 nor dependent on the micro-environment or drug treatment (Bell, Gore et al. 2005, Engelman,  
96 Mukohara et al. 2006, Shaw, Yeap et al. 2009, Yao, Fenoglio et al. 2010, Shaw and Engelman  
97 2016). Also different from quiescent AKT1<sup>low</sup> cancer cells described by the Ramaswamy group,  
98 AXL-positive cells are actively dividing (Kabiraji, Sole et al. 2017).

99

100 At the molecular level, we showed that the generation of AXL-positive cells is centered on the  
101 methylation of a specific CpG island present in the promoter of *MEST*, a gene that contains the  
102 mirRNA miR-335 in its second intron. In particular we showed that forced down-regulation of  
103 miR-335 in AXL-negative cells was sufficient to increase the expression of AXL and to induce  
104 phenotypic and molecular features that are characteristic of AXL-positive cells, such as epithelial-  
105 to-mesenchymal transition and Erlotinib resistance.



106

107 Altogether these observations define a novel mechanism that couples epigenetic/stochastic  
108 inheritance to the ontogeny of the AXL-positive/Erlotinib-resistant cells. This novel framework  
109 could inform the development of novel cancer treatments based on the targeting of both AXL-  
110 negative and AXL-positive cell populations.

111

## 112 **RESULTS**

113

### 114 **AXL-positive cells are pre-existing in cell lines and tumors**

115

116 It has been shown that when non-small cell lung cancer (NSCLC)-derived cell lines harboring  
117 EGFR-oncogenic mutations are exposed to EGFR-TKIs like Erlotinib, populations of AXL-  
118 positive/Erlotinib-resistant cells emerge with features similar to those observed in tumors that have  
119 developed Erlotinib treatment resistance in patients (Zhang, Lee et al. 2012). This is the case for  
120 the NSCLC derived cell lines H1650-M3 and PC14. These cells are derivative of H1650 and PC9  
121 cells respectively, harbor EGFR oncogenic mutations and were previously generated by culturing  
122 the parental cells with constant high concentrations of Erlotinib (Yao, Fenoglio et al. 2010).

123

124 We wondered if AXL-positive cells are present in tumors prior to treatment as well as in tumor  
125 derived cell lines and whether these cells bear phenotypic and molecular similarities to the AXL-  
126 positive cells that are generated upon exposure to EGFR-TKI (Zhang, Lee et al. 2012).

127

128 Given that AXL is a cell surface receptor, we utilized FACS sorting analysis with an antibody that  
129 recognizes an epitope localized within the N-terminal extra-cellular moiety of AXL to identify and  
130 separate putative AXL-positive cells. By using the AXL-positive cell lines, H1650-M3 and PC14  
131 as reference (Figure 1A and B), we observed the presence of AXL-positive cells in multiple  
132 Erlotinib-naïve cell populations (Figure 1B-D). The presence of these AXL-positive cells was not  
133 restricted to tumor-derived cell lines harboring EGFR-oncogenic mutations, as we observed that a  
134 similar percentage of AXL-positive cells were present also in cell lines driven for example by  
135 mutant KRAS (i.e., A549)(Figure 1C-D).

136

137 In tumors, the expression of AXL is often accompanied by the expression of its ligand, GAS6  
138 resulting in the constitutive activation of AXL and its downstream signaling pathways (i.e., AKT  
139 and ERK). We found that this was the case also in the pre-existing FACS-sorted AXL-positive

140 cells. Our RT-PCR and western-blot analysis confirmed the high expression of AXL and GAS6 in  
141 these cells (Figure 1D-F) and indicated that AXL as well as AKT were constitutively  
142 phosphorylated in AXL-positive cells (Figure 1F).

143

144 To exclude the possibility that our observations were an artifact of our cell culture system and more  
145 importantly to test the relevance of our findings in patients, we performed similar analyses in five  
146 primary NSCLC tumors. To limit our analysis only to tumor cells, we analyzed AXL expression  
147 only in cells that were CD45<sup>-</sup>, CD31<sup>-</sup> and EPCAM<sup>mid/high</sup>. This FACS algorithm excludes bone  
148 marrow derived cells, endothelial cells, and fibroblasts. Also in this case, we found that human  
149 primary drug-naïve tumors contained a subpopulation of cells with high expression of AXL and  
150 GAS6 (Figure 1G and H; Figure 1-figure supplement 1A).

151

### 152 **Pre-existing AXL-positive cells have phenotypic and molecular features of Erlotinib-** 153 **resistant cells**

154

155 Having shown the existence of AXL-positive cell populations in primary tumors and in tumor  
156 derived cell lines, next we tested whether these cells had phenotypic and molecular features of  
157 Erlotinib resistant AXL-positive cells. We found that AXL-positive FACS-sorted cells from  
158 Erlotinib-naïve cell lines (i.e., PC9 AXL<sup>+ve</sup>) and AXL-positive cells that were generated upon  
159 Erlotinib-selection (i.e., PC14) had similar sensitivity to Erlotinib treatment with IC<sub>50</sub> almost 3  
160 times higher than parental cells (i.e., PC9) (Figure 2A). To further explore the role of AXL in  
161 adaptive resistance to TKI, we performed an Erlotinib and Gefitinib sensitivity assay with AXL-  
162 negative and positive cells mixed together in different ratios. We found that the presence of AXL-  
163 positive cells resulted in a significantly higher number of drug-resistant colonies, compared with  
164 only AXL-negative cells (Figure 2-figure supplement 1 A-B).

165

166 The FACS-sorted AXL-positive cells looked very similar to the AXL-positive cells that emerged  
167 following Erlotinib treatment (PC14 and H1650-M3). All possessed the morphological and  
168 molecular features of mesenchymal cells, including loss of cobblestone shape and increased stress  
169 fibers (Figure 2B and Figure2-figure supplement 1C) and differential expression of mesenchymal  
170 and epithelial markers (e.g., TGF-β1, TGF-β2, Slug, Twist, Vimentin and Zeb1) (Figure 2C; Figure  
171 2-figure supplement 1D) (Zhang, Lee et al. 2012, Byers, Diao et al. 2013). These phenotypic  
172 features were driven by AXL because the inactivation of AXL in AXL-positive cells using the

173 pharmacological inhibitor BMS-777607 resulted in the loss of the mesenchymal marker Vimentin  
174 and increased expression of E-cadherin (Figure 2-figure supplement 1E).

175

176 Epithelial-to-mesenchymal transition can be induced by multiple cues, including the over-  
177 expression of certain receptor tyrosine kinase receptors like AXL, c-MET, PDGFR; exposure to  
178 TGF- $\beta$ 1, TGF- $\beta$ 2; or hypoxia (Yao, Fenoglio et al. 2010, Wu, Hou et al. 2013, Zhang, Huang et al.  
179 2013, Rankin, Fuh et al. 2014, Elkabets, Pazarentzos et al. 2015, Li, Dobbins et al. 2015). Hence,  
180 we wondered whether the expression of AXL was a common feature of all mesenchymal cells or  
181 if on the contrary was specific to a particular cell state. Hence, we analyzed the presence of AXL-  
182 positive cells in multiple tumor derived cell lines and correlate their distribution with the  
183 mesenchymal status of the cells. Despite H1703, H1975 and H23 cells present with clear  
184 mesenchymal characteristics, AXL-positive cells were virtually absent in these cell lines (Figure  
185 2-figure supplement 2A-C). Hence we concluded that while all mesenchymal cells share common  
186 characteristics such as increased stress fibers, increased motility, elongated shape, etc.; AXL-  
187 positive cells are a unique cell population with features that only partially overlap with other  
188 mesenchymal cells.

189

#### 190 **AXL-positive cells are generated stochastically**

191

192 Cancer cells are characterized by intrinsic genetic instability that can give rise to clonal cell  
193 populations with distinctive genotypic and phenotypic qualities (Greaves and Maley 2012, Barber,  
194 Davies et al. 2015). In addition, it has been shown that intra-tumor heterogeneity could be spurred  
195 by non-genetic determinants (Polyak and Weinberg 2009, Meacham and Morrison 2013). In this  
196 regard, Gupta et al. have suggested that cancer cells can oscillate stochastically among different  
197 cell states characterized by differential expression of the surface markers CD44 and CD24 (Gupta,  
198 Fillmore et al. 2011). More recently, the Haber group also showed that circulating tumor cells from  
199 ER+/HER- patients can be HER2- and HER2+, and readily interconvert from one state to the other  
200 within 4 doubling times (Jordan, Bardia et al. 2016).

201

202 Here we tested if AXL-positive cells were generated stochastically. In fact, we reasoned that if the  
203 AXL-positive cells were generated by mutations, it would be very unlikely that these mutations  
204 would occur in synchrony. If this were the case, then we would expect the percentages of AXL-  
205 positive cells to vary across clonal cell lines derived from a single AXL-negative cell (Figure 3A).  
206 On the other hand, if the AXL-positive cells were generated through a stochastic event, we instead

207 would predict the percentages of AXL-positive cells to be similar in multiple clonal cell lines  
208 derived from a single AXL-negative cell (Figure 3B).

209

210 To explore these two models, we derived isogenic cell lines from FACS sorted AXL-negative  
211 H1650 and HCC827 cells; allowed them to expand; and then assessed the frequency of AXL-  
212 positive cells from four, single-cell derived clonal cell lines. We observed a very similar percentage  
213 of AXL-positive cells in the parental cells as well as in the single-cell derived clonal cell lines  
214 (Figure 3C-D; Figure 3-figure supplement 1A and B). Based on this finding, we concluded that  
215 AXL-positive cells are most likely generated from AXL-negative cells via a non-genetic, stochastic  
216 mechanism.

217

218 To further confirm this observation and to improve our understanding of the cell-state plasticity of  
219 AXL-positive and AXL-negative cells, we sorted pure AXL-positive and AXL-negative cells from  
220 the H1650 cell line and analyzed the distribution of AXL-positive and AXL-negative progeny of  
221 cells over time (Figure 3E). We found that within three weeks, the AXL-negative cells could  
222 regenerate cell populations with the same percentage of AXL-positive and AXL-negative cells as  
223 the parental cell line. Interestingly, we observed that even though the AXL-positive cells took a  
224 longer time to do so (18 weeks), they too were able to regenerate a progeny population with the  
225 same percentages of AXL-positive and AXL-negative as present in the parental cell line. To  
226 exclude the possibility that this finding was the result of competition among clones driven by  
227 genetic mutations, we repeated the same experiments using a single-cell derived cell line (e.g.,  
228 H1650- clone 2). In this case, a nearly identical trend was recapitulated (Figure 3F).

229

### 230 **miRNA profiling of AXL-positive cells revealed a unique miRNA signature**

231

232 Among the many possible regulators of cell-state plasticity, we sought to investigate whether  
233 microRNAs (miRNAs) were involved in modulating the ontogeny of AXL-positive cells (Garzon,  
234 Marcucci et al. 2010).

235

236 miRNAs are small (~22 nt) non-coding RNAs constituting a novel class of gene regulators that  
237 post-transcriptionally repress gene expression by initiating the degradation or blocking translation  
238 of target mRNAs (Lau, Lim et al. 2001, Lee and Ambros 2001, Ambros, Bartel et al. 2003). More  
239 than 1000 unique, mature miRNAs have been identified in the human genome (Griffiths-Jones  
240 2004) and each may regulate up to 200 mRNAs (Lewis, Shih et al. 2003, Betel, Wilson et al. 2008).

241 In fact, it is estimated that roughly 30% of all human gene transcripts are targeted by miRNAs,  
242 implicating them in the regulation of virtually all cellular processes.

243

244 We generated miRNA expression profiles from the AXL-positive H1650-M3 and parental AXL-  
245 negative H1650 cells by constructing small RNA libraries. These libraries were deep sequenced  
246 using the Illumina platform. Sequence reads were mapped to the human genome using a customized  
247 bioinformatics pipeline. Reads were annotated by BLAT (Kent 2002) to a unified database  
248 containing entries for human small RNAs from miRBase (Griffiths-Jones 2004), NONCODE (Liu,  
249 Bai et al. 2005), tRNAs in The RNA Modification Database (Limbach, Crain et al. 1994), and  
250 rRNA entries in the Entrez Nucleotide Database (Schuler, Epstein et al. 1996). Our previous  
251 experience performing comparative analysis informed our decision to use an arbitrary cut-off of a  
252 minimum of 1000 reads and >2 fold differential expression. Using these criteria, we identified 20  
253 miRNAs that were up-regulated and 19 miRNAs that were down-regulated in the AXL-positive  
254 H1650-M3 cells compared to the AXL-negative H1650 cells (Figure 4A and B). Differential  
255 miRNA expression levels were independently validated by quantitative stem-loop RT-PCR (qRT-  
256 PCR) in the AXL-negative (H1650) and AXL-positive (H1650-M3) cell lines (Figure 4C). Apart  
257 from let7c, the differential miRNA expression patterns of all miRNAs identified by our deep  
258 sequencing analysis were confirmed (Figure 4C).

259

260 Although none of the identified miRNAs were predicted to target AXL, we were intrigued by the  
261 differential expression of miR-335 we observed in AXL-positive compared to AXL-negative  
262 cells. In fact, miR-335 has been reported to suppress a mesenchymal-like state and metastatic  
263 dissemination by targeting a diverse set of genes regulating cell migration, extra-cellular matrix  
264 remodeling, cell self-renewal and epigenetic reprogramming (Tavazoie, Alarcon et al. 2008)  
265 (Figure 1D). Among them, of particular interest was the regulation of the TGF- $\beta$  axis by miR-  
266 335. In fact, TGF- $\beta$  is a well known regulator of AXL and AXL activity (Lynch, Fay et al. 2012).  
267 Furthermore, the TGF- $\beta$  axis has also been shown to suppress the expression of multiple miRNAs  
268 that we found to be down-regulated in AXL-positive cells (Gregory, Bracken et al. 2011, Yang,  
269 Li et al. 2012, Kato, Dang et al. 2013). Altogether these findings let us to hypothesize that  
270 differentially expressed miRNAs in AXL-positive cells could be part of a hierarchically  
271 organized miRNA cluster primed by miR-335 and that the regulation of miR-335 could play a  
272 major role in the ontogeny of AXL-positive cells.

273

274 As a first step to test this possibility, we determined how general was the decreased in miR-335  
275 expression we observed in AXL-positive cells. To this end, we examined the expression of miR-  
276 335 in: 1) Erlotinib resistant H1650-M3 and PC14 cells (Figure 4E), 2) FACS sorted AXL-  
277 positive and AXL-negative cells from H1650 and HCC827 cell lines (Figure 4F), as well as 3)  
278 FACS sorted cells from four human primary NSCLC tumors (Figure 4G). In all these cases, when  
279 we measured the expression of miR-335 by qRT-PCR, we consistently found that miR-335 levels  
280 were decreased in all AXL-positive cells (Figure 4E-G).

281

282 To verify that miR-335 was active in AXL-positive cells, next, we compared the expression  
283 levels of known and predicted miR-335 targets. RT-PCR analysis showed that the miR-335  
284 targets SOX4, TNC, COL1A1, PTPRN2, MERTK, PLCB1, LAMB2, FGF2, JAG1, BMI1,  
285 SMARCA2, MAX were expressed at higher levels in AXL-positive; miR-335 low cells (H1650-  
286 M3) compared to AXL-negative; miR-335 high cells (H1650) (Figure 4D).

287

288 We previously have shown that AXL-positive cells have an increased activation of the TGF-beta  
289 pathway (See figure 2). To determine if miR-335 was sufficient to regulate the activity of the  
290 TGF- $\beta$  pathway, we inactivated miR-335 by transfecting AXL-negative cells with three  
291 independent Antagomirs and assessed the expression of TGF- $\beta$  1 and 2 and some of their down-  
292 stream targets (e.g., Vim, Ecadh, Snail) by RT-PCR. We found that the Antagomirs treatment  
293 decreased the expression of miR-335 (Figure 4-figure supplement 1A) and of its targets (Figure  
294 4-figure supplement 1B) as well as of TGF- $\beta$  1/ 2 (Figure 4-figure supplement 1C) and of the  
295 TGF- $\beta$  target genes VIM, Ecadh, SNAI, SLUG, etc. compared to control (Figure 5D).

296

297 As reported in the literature, we also observed the majority of miRNAs we observed to be  
298 differentially expressed in AXL-positive and AXL-negative cells to be regulated by TGF- $\beta$  1/ 2  
299 except for MiR-335 (Figure 4H and I). Consistent with TGF-beta being regulated by miR-335, we  
300 also found that inactivation of miR-335 was sufficient to reduce the expression of these miRNAs  
301 (miR-20a, miR-34a, miR-200c, etc.) but to increase the expression of miR-143 and miR-195,  
302 which were expressed at higher levels in AXL-positive cells when compared to AXL-negative  
303 cells (Figure 4J).

304

305 **miR-335 regulates the ontogeny of AXL-positive cells.**

306



307 Our data indicated that miR-335 regulate the expression of key molecular determinant of the  
308 AXL-positive state. To test if miR-335 could regulate the ontogeny of AXL-positive cells, we  
309 decreased the expression of miR-335 using Antagomir treatment in multiple AXL-negative cells  
310 and analyzed the morphology, the expression of signature genes as well as their resistance to  
311 EFGR Tki.

312

313 We observed that treatment of AXL-negative cell lines (H1650 and PC9) with a miR-335  
314 Antagomir resulted in a reduction of miR-335 expression (Figure 5A) and an increased expression  
315 of AXL-positive cells (Figure 5B; Figure 5-figure supplement 1A). This was accompanied by  
316 epithelial- to-mesenchymal transition manifested by loss of the classic cobblestone appearance of  
317 epithelial cells (Figure 5C) and changes in EMT molecular markers (Figure 5D).

318

319 In a standard drug sensitivity assay, we observed that treatment with miR-335 Antagomir also  
320 increased the cells resistance to Erlotinib treatment to levels similar to what we observed when we  
321 tested the AXL-positive cell lines we derived by Erlotinib selection (Figure 5 E and F).

322

323 To provide additional proof that inhibition of miR-335 was sufficient for the generation of AXL-  
324 positive cells, we utilized CRISPR-CAS9 gene editing as an orthogonal approach. Also in this case  
325 and consistent with our previous results, genetic inactivation of miR-335 resulted in the acquisition  
326 of phenotypic and molecular characteristics of AXL-positive cells (Figure 5-figure supplement 2A-  
327 C).

328

329 Altogether, these observations indicate that miR-335 serves as a critical regulator of the  
330 interconversion of AXL-negative and AXL-positive cell states beyond its well-studied role in the  
331 regulation of metastasis (Tavazoie, Alarcon et al. 2008).

332

333 **Methylation of *MEST* isoform 2 promoter modulates miR-335 expression in AXL-positive**  
334 **cells**

335

336 The miR-335 encoding sequence resides in the second intron of the *mesoderm-specific transcript*  
337 *homolog (MEST)/paternally expressed 1 (PEG1)* gene located on chromosome 7q32. In humans,  
338 two distinct CpG islands have been identified in the promoters of *MEST* (Figure 6A) (Png, Yoshida  
339 et al. 2011, Dohi, Yasui et al. 2013). To investigate the possible epigenetic regulation of miR-335,  
340 we analyzed levels of *MEST* CpG island 1 and 2 methylation by bisulfite sequencing, methylation-

341 specific RT-PCR, as well as qRT-PCR in AXL-positive H1650-M3 and AXL-negative H1650 cells  
342 (Figure 6A and B). We found that although no significant differences were observed in the  
343 methylation of CpG island 2, CpG island 1 was differentially methylated in the AXL-positive  
344 H1650-M3 cells, and associated with higher expression of MEST isoform 1 and decreased  
345 expression of miR-335 (Figure 6B, Figure 6-figure supplement 1A).

346

347 We extended these analyses to include AXL FACS sorted cell lines (H1650 and PC9) and human  
348 NSCLC tumor-derived cells. Again, we found that all AXL-positive cells displayed an increased  
349 methylation of CpG island 1 relative to AXL-negative cells (Figure 6C and D; Figure 6-figure  
350 supplement 1B).

351

352 To establish the functional relevance of the hyper-methylation of the *MEST* isoform 2 promoter,  
353 we treated AXL-negative H1650 cells and AXL-positive H1650-M3 cells with the DNA  
354 methylation inhibitor 5-aza-2'-deoxycytidine (5-aza-dC) along with Trichostatin A (TSA). We  
355 observed a dose-dependent change in the methylation of CpG island 1 and, consistent with the role  
356 of CpG island hyper-methylation in gene silencing, increased expression of miR-335 in AXL-  
357 positive cells (Figure 6E and F). Importantly, no differences were observed in the AXL-negative  
358 H1650 cells upon treatment with 5-aza-dC compared to the control. In accordance with the  
359 proposed role of miR-335 in the regulation of AXL, we also observed a decrease in AXL mRNA  
360 expression along with a decrease in the proportion of AXL-positive cells upon inhibiting DNA  
361 methylation with 5-Aza-dC (Figure 6G; Figure 6-figure supplement 1C). These changes were most  
362 likely due to increased miR-335 levels as inhibition of miR-335 by Antagomir treatment impeded  
363 the observed decrease in the number of AXL-positive cells in H1650-M3 cells (AXL-positive)  
364 treated by 5-aza-dC (Figure 6G).

365

366 To further characterize a possible role of miR-335/*MEST* DNA methylation in Erlotinib resistance,  
367 we performed a drug sensitivity assay after pre-treating the cells with 5-Aza-dC. Consistent with  
368 5-Aza-dC decreasing *MEST* promoter methylation and AXL expression in AXL-positive cells  
369 (Figure 6E-G), we observed a decreased in AXL-positive cells in H1650 cells upon 5-Aza-dC  
370 treatment (Figure 6-figure supplement 1D) and an increased sensitivity of cells to Erlotinib (Figure  
371 6H).

372

373 Based on these observations, we concluded that differential miR-335 promoter methylation is  
374 responsible for the decreased expression of miR-335 observed in AXL-positive cells, and that the



375 transition between the AXL-positive and AXL-negative cell states as well as their differential  
376 resistance to EGFR TKi is regulated epigenetically.  
377

## 378 **DISCUSSION**

379

380 Drug resistance continues to be a major hurdle that oncologists face in treating cancer patients.  
381 Although the genetic diversity of tumors has been proposed to drive the acquisition of drug  
382 resistance; emerging data indicate that also non-genetic determinants could be equally significant  
383 (Brock, Chang et al. 2009). These include the interaction of a tumor with its micro-environment as  
384 well as the occurrence of cell-intrinsic molecular mechanisms such as epigenetic changes (Brock,  
385 Chang et al. 2009, Muranen, Selfors et al. 2012).

386

387 In the case of lung tumors driven by oncogenic-EGFR mutations, it has been observed that  
388 approximately 15% of tumors that become resistant to EGFR TKi are characterized by  
389 mesenchymal like features and higher expression of AXL. In these tumors inhibition of AXL  
390 restore the sensitivity to EGFR TKi (Zhang, Lee et al. 2012). In contrast to other mechanisms of  
391 resistance to EGFR TKi, in these tumor cells AXL was neither mutated, amplified or its expression  
392 driven by EGFR TKi treatment as in the case of the persistent cells originally described by  
393 Settleman et al. (Sharma, Lee et al. 2010).

394

395 Here we described a novel molecular mechanism driving the ontogeny of AXL-positive EGFR TKi  
396 resistant cells based on the stochastically fluctuation of cancer cells between an AXL-negative state  
397 characterized by epithelial-like features and an AXL-positive state in which cells are mesenchymal  
398 and have an increased resistance to EGFR TKi (Figure 7). The switch between these two cell-states  
399 is restricted by miR-335 as all AXL-positive cells we examined were characterized by a decreased  
400 expression of miR-335 and that inactivation of miR-335 decreased the number of AXL-positive  
401 cells and reverted AXL-positive cells into AXL-negative cells.

402

403 Although miR-335 restricts the transition of AXL-positive into AXL-negative cells, AXL mRNA  
404 does not contain a miR-335 seeding sequence, which means it is unlikely to be a direct target of  
405 miR-335. Yet, miR-335 has been previously shown to regulate the expression of a multitude of  
406 signaling pathways including components of the TGF- $\beta$  axis. The regulation of the TGF- $\beta$  axis by  
407 miR-335 is of particular interest because AXL is a known downstream target of TGF- $\beta$ ; hence  
408 suggesting a possible molecular linking AXL and miR-335 (Bauer, Zagorska et al. 2012).

409

410 The inhibition of the TGF- $\beta$  signaling pathway by miR-335 is particularly interesting also because  
411 exposure to TGF- $\beta$  regulate the expression of several of the miRNAs associated with the AXL-

412 positive state, such as miR-20a, miR-34a, miR-200c, etc. Among them of particular significance  
413 were the mir-200 family members, as they not only induce EMT but also resistance to Erlotinib  
414 (Brabletz and Brabletz 2010).

415

416 Lastly, miR-335 is among approximately 50 miRNAs that are regulated epigenetically by DNA  
417 methylation of CpG islands within promoter regions (Lujambio and Esteller 2007). The epigenetic  
418 regulation of miR335 is particularly interesting in light of the observation that AXL-positive and  
419 AXL-negative cell populations are highly dynamic. AXL FACS-sorted cells can in fact interconvert  
420 until the same two cell states distribution observed in the parental cell population is reached (Figure  
421 3E). Notably, we observed the time required for AXL-positive and AXL-negative cell populations  
422 to reach equilibrium is different. While within a few weeks the AXL-negative cells generated a  
423 population of cells with the same distribution of AXL-positive and AXL-negative cells as was  
424 observed in the parental cell line; it took the AXL-positive cells a couple of months to reach this  
425 equilibrium. At this time, we don't have a clear molecular mechanism explaining these differences,  
426 yet it is tentative to hypothesize that --given the stochastic regulation of miR335-- because the  
427 AXL-positive cells grow slower than AXL-negative cells, it will take longer time for the former to  
428 switch state. Alternatively, it is tempting to postulate that the inter-conversion between the two cell  
429 states could be regulated by enzymatic activities occurring at different rates. This hypothesis is  
430 informed by the possibility that the de-methylation rate of the CpG1 on the miR-335 promoter  
431 could occur less efficiently than its methylation.

432

433 One important feature of AXL-positive cells is their intrinsic resistance to EGFR TKi. This implies  
434 that because AXL-positive cells could revert back to an AXL-negative state, the drug resistance  
435 observed in AXL-positive tumors, although heritable, is not a stable trait in the population.  
436 Consequently, as shown in the schematic in Figure 7, AXL-negative cells could hypothetically  
437 emerge over time following drug removal. This phenomenon is in principle similar to the  
438 observation that certain Erlotinib-resistant tumors expressing neuroendocrine markers can revert to  
439 an epithelial-like state over time upon interruption of the drug treatment (Niederst, Sequist et al.  
440 2015).

441

442 Nevertheless, the AXL-positive cells that survived to the drug treatment can accumulate novel  
443 genetic mutations that can alter the innate equilibrium between AXL-positive and AXL-negative,  
444 and, consequently, produce tumors that are stable AXL-positive state (Figure 7). This explanation  
445 seems to hold true for certain clonal populations, including the H1650-M3 and PC14 cells that were

446 selected to grow and expand in the presence of high Erlotinib concentrations. In fact, these cell  
447 lines maintain features associated with the AXL-positive cell state even in the absence of drug  
448 treatment. Interestingly, we have recently observed that TGF-beta by repressing DNA repair could  
449 spur the accumulation of mutations and accelerate the clonal evolution of tumors (Pal, Pertot et al.  
450 2017). These findings have important clinical implications. They in fact predict that treatments  
451 based only on targeting the epithelial, AXL-negative cells will be insufficient and destined to fail.  
452

## 453 **MATERIALS AND METHODS**

### 454 **Cell culture**

455 H1650, HCC4006, HCC827, A549, H358 and H2228 cell lines were purchased from American  
456 Type Culture Collection. All cell lines were authenticated through Short Tandem Repeat (STR)  
457 profiling and regularly tested for mycoplasma. H1650-M3 was generated by culturing H1650 cell  
458 line in the presence of a constant high concentration of Erlotinib. All cell lines were maintained in  
459 RPMI GlutaMAX (Invitrogen) containing 5% Fetal Bovine Serum. Medium was supplemented  
460 with 100 units/ml of penicillin and 100 ug/ml of Streptomycin (Invitrogen). All cell lines were  
461 cultured at 37°C and 5% CO<sub>2</sub>.

462

### 463 **Generation of isogenic clones:**

464 H1650 cells were serially diluted in 96 wells such that one well contains one cell. They were then  
465 grown for 2 months before the experiments.

466

### 467 **TGF- $\beta$ treatment**

468 Cells were treated with rhTGF $\beta$ 1 and rhTGF $\beta$ 2 (R&D systems, Minneapolis, MN) 1 ng/ml each in  
469 complete media, for 72 hrs. Following treatment, the cells were harvested for RNA preparation and  
470 qRT-PCR, for immunoblotting or for cell cycle analysis.

471

### 472 **TGF- $\beta$ inhibitor treatment**

473 For treatment with LY2157299 (20  $\mu$ M) (TGFBR1 kinase inhibitor, Selleckchem, Houston, TX),  
474 300,000 H1650-M3 cells were plated in a 6 cm<sup>2</sup> plate. Inhibitor was added the next day and the  
475 mixture was incubated for 3–5 days for LY2157299. The cells were lysed with TRIzol and  
476 processed for RNA preparation.

477

### 478 **Drug treatment**

479 To determine IC<sub>50</sub> values for various drugs (Erlotinib and BMS-777607), the cells were plated in  
480 96-well plates at 1000 cells/well. The next day, individual drugs were added to the wells at the  
481 indicated concentrations and incubated for 5 days. The plates were then washed once with PBS,  
482 fixed with 3.7% formaldehyde and stained with Crystal violet. Each stained well was destained in  
483 50-100  $\mu$ l of 10% acetic acid and the absorbance was read in a spectrophotometer at 590 nm.

484

### 485 **Long term drug treatment to generate persisters**

486

#### 487 **RNAi Transfection, RNA extraction and quantitative Real-Time PCR**

488 RNAi transfection was performed using Lipofectamine™ 2000 (Invitrogen) as per manufacturer's  
489 protocol. Unless otherwise indicated, total RNA was collected 72 hours after transfection. Total  
490 RNA was extracted using Trizol (Life technologies). Removal of contaminating genomic DNA was  
491 performed by incubation with RQ1 RNase-Free DNase (Promega) for 30 min. 1000ng total RNA  
492 was reverse transcribed using ImProm-II reverse transcriptase and Oligo-dT primers. Quantitative  
493 PCR was carried out using Power SYBR Green PCR master mix on a 7900HT Fast Real-Time  
494 System (Applied Biosystems) or QuantStudio-6 Real-Time System (Applied Biosystems). Power  
495 SYBR Green Cells-to-Ct kit was used to perform quantitative PCR on 10,000 cells sorted from  
496 tumors. Analyses were done in triplicate and Actin or GAPDH were used as a reference gene. A  
497 complete list of primer sequences is supplied in Supplementary file 1.

498

#### 499 **miRNA analysis**

500 Total RNA was extracted using miRCURY™RNA isolation kit- cell & plant (Exiqon) according  
501 to manufacturer's instructions. On-column removal of genomic DNA was performed using RQ1  
502 RNase-Free DNase (Promega). cDNA synthesis was performed using miRCURY LNA Universal  
503 RT microRNA PCR, Polyadenylation and cDNA synthesis kit (Exiqon; 203300) and miRCURY  
504 LNA Universal RT microRNA PCR SYBR green master mix was used for quantitative real-time  
505 PCR analysis. U6 snRNA was used as reference gene. A complete list of primer sequences is  
506 supplied in Supplementary file 1.

507

#### 508 **Methylation specific RT-PCR, QPCR and bisulfite sequencing**

509 1 µg genomic DNA was pretreated with sodium hydroxide for 15 minutes at 37 °C followed by  
510 incubation with hydroquinone (Sigma) and sodium metabisulfite (Sigma) for 16 hours at 50°C. The  
511 bisulfite modified DNA was subsequently purified using Wizard DNA Clean-up system (Promega).  
512 Genomic DNA from in vitro methylated Jurkat cells were (Active Motif) served as positive control  
513 and genomic DNA from H1993 cells served as negative control. RT-PCR analysis was performed  
514 using Immolase DNA polymerase (Bioline) and fragments were separated on 2% agarose gels.  
515 Takara Episcopy MSP kit was used for performing quantitative RT-PCR on a 7900HT Fast Real-  
516 Time System (Applied Biosystems). For analysis by bisulfite sequencing, fragments were cloned  
517 into the pGEM®-T Easy Vector (Promega) and 20 colonies from each sample were sequenced. A  
518 complete list of primer sequences is supplied in Supplementary file 1.

519

520 **Immunofluorescence**

521 AXL -ve and AXL-positive cells from H1650 and PC9 were FACS-sorted and cultured for 2 days  
522 in an 8-well chamber slide system (LAB-TEK, Thermo Fisher Scientific). H1650, H1650-M3, PC9  
523 and PC14 cells were grown on glass coverslips in a 24-well Petri dish. Cells were fixed with 4%  
524 para-formaldehyde and permeabilized in 0.1% Triton X-100 in PBS for 10 minutes. Fixed cells  
525 were washed three times in PBS and blocked with 1% BSA in PBS for 1 hour. After washing three  
526 times with PBS, the cells were incubated with Alexa-Fluor 488 Phalloidin for 30 min at room  
527 temperature. DAPI was used for nuclear staining. The stained cells were mounted with a  
528 Vectashield mounting medium (Vector Laboratories, Burlingame, California) and analyzed using  
529 a confocal microscope.

530

531 **Immunoprecipitation and Western Blot Analysis**

532 Total cell lysates were obtained by lysing cells in modified denaturing buffer (50mM Tris-Cl pH  
533 7.5, 1 mM EDTA, 1 mM EGTA 1% Triton-X, 0.27M Sucrose, 1%  $\beta$ -mercaptoethanol) with  
534 protease inhibitor tablets and phosphatase inhibitors (10mM NaF, 1mM PMSF, 1mM  $\text{Na}_3\text{VO}_4$ ).  
535 Lysate were incubated on ice for 30 min, mixed end-to-end at 4C for 30 min and then centrifuged  
536 at 13,000g for 30 min to remove debris. 1500  $\mu\text{g}$  total protein lysate was 100ul slurry of pre-cleared  
537 with Protein G agarose beads (Promega), followed by overnight incubation with AXL antibody  
538 (2ug Ab/ 100 ul lysate). Immunocomplexes were pulled down by incubating with 100ul slurry of  
539 pre-cleared with Protein G agarose beads. Immunoprecipitation complex and 10% lysate inputs  
540 were separated on 8% polyacrylamide gels, transferred to nitrocellulose membrane and blotted  
541 overnight with antibody against AXL, Phospho-AXL, Phospho-Tyrosine.  $\beta$ -tubulin was used was  
542 used as loading control.

543

544 **Flow cytometry**

545 Cells were dissociated using TrypLE (Invitrogen) and washed with cold PBS containing 5% Fetal  
546 Bovine Serum. Resuspended cells were filtered through a 40 micron mesh to generate single cell  
547 suspension and incubated with directly conjugated fluorescent antibodies to the desired antigens  
548 for 20 minutes on ice in the dark and subsequently washed 3 times with cold PBS pH 7.2. Analysis  
549 of AXL-negative and AXL-positive cell populations was performed on the LSR II (BD  
550 Biosciences). A total of 20,000 cells were analyzed using the FACSDiva 6.0 software (BD  
551 Biosciences). Isolation of AXL-negative and AXL-positive cells were done by Fluorescent  
552 Activated Cell Sorting performed on the Aria II (BD Biosciences). For sorting cells from tumor,  
553 we stained a single-cell suspension derived from tumors with CD45, CD31, EpCAM and AXL

554 antibodies. Based on the isotype staining, we gated the CD45-/ CD31-/ EpCAM<sup>mid/high</sup> population  
555 and then gated the desired AXL-negative and AXL-positive populations from the EpCAM<sup>mid/high</sup>  
556 population.

557

### 558 **Statistical analysis**

559 Data are represented as mean  $\pm$  SD. Statistical analysis of experimental data were conducted using  
560 GraphPad Prism 7.0 software (San Diego, CA, USA). Student's t-test (two tailed) was used for two  
561 group comparisons. Spearman's rank test was used to measure correlation between two variables.  
562  $P < 0.05$  was considered statistically significant.

563

### 564 **Patient Study Details:**

565 The collection of human lung tissue samples and blood for this study was covered by Northwell  
566 Health/ Cold Spring Harbor Laboratory IRB #TDP-TAP 1607 (Raffaella Sordella/10/11/16 ). The  
567 samples were acquired from patients already undergoing thoracic procedures (e.g. surgical tumor  
568 resection, biopsy) at Huntington Hospital. All study participants provided informed consent for the  
569 use of their lung tissue and blood for research purposes. Participants were informed of study aims,  
570 the potential risks and benefits of participation, and that any discoveries facilitated by the analysis  
571 of their tissues might be published. The participants were informed that their names would not be  
572 associated their samples in any publication or presentation of research findings.

573

### 574 **Reagents**

575 Recombinant human TGF- $\beta$ 1 and TGF- $\beta$ 2 was purchased from R&D Systems. miR-335  
576 antagomirs were obtained from the following companies: antagomir 1 from Ambion; antagomir 2  
577 from Exiqon (miRCURY LNA microRNA Power Inhibitor; 4100464-002) and antagomir 3 from  
578 Thermo Scientific Dharmacon (miRIDIAN hairpin inhibitor; IH-300708-07). miR-335 Mimic  
579 oligonucleotide was obtained from Exiqon (473600-001). The following chemical reagents were  
580 used for cell treatment: Erlotinib Hydrochloride 99% from LGM Pharmaceutical Inc, pyridone 6  
581 (P6) from Calbiochem, Trichlostatin (TSA) and 5-aza-2-deoxycytidine from Sigma-Aldrich.

582

### 583 **Antibodies**

584 *For Flow Cytometry*

585 APC anti-human AXL antibody (R & D Systems); cat # FAB154A

586 Alexa Fluor 488 anti-human AXL

587 PE-CF594 anti-human CD45 antibody (BD Biosciences); cat. # 562279



588 BV421 anti-human CD31 antibody (BD Biosciences); cat # 564089  
589 Alexa Fluor 488 anti-human CD326 (Ep-CAM) antibody (BioLegend); cat # 324210  
590  
591 *For Immunofluorescence*  
592 Alexa Fluor 488 Phalloidin (Thermo Fisher)  
593  
594 *For Immunoprecipitation and Immunoblot analysis*  
595 AXL M-20 goat polyclonal IgG (SCBT); cat. # sc-1097. Currently discontinued.  
596 Anti-alpha-tubulin antibody (Millipore) cat. # MABT205  
597 Phospho- Tyr PY20 mouse monoclonal IgG (SCBT); cat. # sc-508  
598 Phospho-AXL mouse monoclonal IgG (R & D Biosystems); cat. #  
599 Gas6  
600 GAPDH  
601 Ras-GAP  
602  
603

604 **REFERENCES**

605

- 606 Ambros, V., B. Bartel, D. P. Bartel, C. B. Burge, J. C. Carrington, X. Chen, G. Dreyfuss, S.  
607 R. Eddy, S. Griffiths-Jones, M. Marshall, M. Matzke, G. Ruvkun and T. Tuschl (2003). "A  
608 uniform system for microRNA annotation." *RNA* **9**(3): 277-279.
- 609 Barber, L. J., M. N. Davies and M. Gerlinger (2015). "Dissecting cancer evolution at the  
610 macro-heterogeneity and micro-heterogeneity scale." *Curr Opin Genet Dev* **30**: 1-6.
- 611 Bauer, T., A. Zagorska, J. Jurkin, N. Yasmin, R. Koffel, S. Richter, B. Gesslbauer, G. Lemke  
612 and H. Strobl (2012). "Identification of Axl as a downstream effector of TGF-beta1  
613 during Langerhans cell differentiation and epidermal homeostasis." *J Exp Med*  
614 **209**(11): 2033-2047.
- 615 Bean, J., C. Brennan, J. Y. Shih, G. Riely, A. Viale, L. Wang, D. Chitale, N. Motoi, J. Szoke,  
616 S. Broderick, M. Balak, W. C. Chang, C. J. Yu, A. Gazdar, H. Pass, V. Rusch, W. Gerald, S.  
617 F. Huang, P. C. Yang, V. Miller, M. Ladanyi, C. H. Yang and W. Pao (2007). "MET  
618 amplification occurs with or without T790M mutations in EGFR mutant lung tumors  
619 with acquired resistance to gefitinib or erlotinib." *Proc Natl Acad Sci U S A* **104**(52):  
620 20932-20937.
- 621 Bell, D. W., I. Gore, R. A. Okimoto, N. Godin-Heymann, R. Sordella, R. Mulloy, S. V.  
622 Sharma, B. W. Brannigan, G. Mohapatra, J. Settleman and D. A. Haber (2005).  
623 "Inherited susceptibility to lung cancer may be associated with the T790M drug  
624 resistance mutation in EGFR." *Nat Genet* **37**(12): 1315-1316.
- 625 Ben-Batalla, I., A. Schultze, M. Wroblewski, R. Erdmann, M. Heuser, J. S. Waizenegger,  
626 K. Riecken, M. Binder, D. Schewe, S. Sawall, V. Witzke, M. Cubas-Cordova, M. Janning,  
627 J. Wellbrock, B. Fehse, C. Hagel, J. Krauter, A. Ganser, J. B. Lorens, W. Fiedler, P.  
628 Carmeliet, K. Pantel, C. Bokemeyer and S. Loges (2013). "Axl, a prognostic and  
629 therapeutic target in acute myeloid leukemia mediates paracrine crosstalk of  
630 leukemia cells with bone marrow stroma." *Blood* **122**(14): 2443-2452.
- 631 Betel, D., M. Wilson, A. Gabow, D. S. Marks and C. Sander (2008). "The microRNA.org  
632 resource: targets and expression." *Nucleic Acids Res* **36**(Database issue): D149-153.
- 633 Brabletz, S. and T. Brabletz (2010). "The ZEB/miR-200 feedback loop--a motor of  
634 cellular plasticity in development and cancer?" *EMBO Rep* **11**(9): 670-677.
- 635 Braunger, J., L. Schleithoff, A. S. Schulz, H. Kessler, R. Lammers, A. Ullrich, C. R. Bartram  
636 and J. W. Janssen (1997). "Intracellular signaling of the Ufo/Axl receptor tyrosine  
637 kinase is mediated mainly by a multi-substrate docking-site." *Oncogene* **14**(22):  
638 2619-2631.
- 639 Brock, A., H. Chang and S. Huang (2009). "Non-genetic heterogeneity--a mutation-  
640 independent driving force for the somatic evolution of tumours." *Nat Rev Genet*  
641 **10**(5): 336-342.
- 642 Brose, M. S., P. Volpe, M. Feldman, M. Kumar, I. Rishi, R. Gerrero, E. Einhorn, M. Herlyn,  
643 J. Minna, A. Nicholson, J. A. Roth, S. M. Albelda, H. Davies, C. Cox, G. Brignell, P.  
644 Stephens, P. A. Futreal, R. Wooster, M. R. Stratton and B. L. Weber (2002). "BRAF and  
645 RAS mutations in human lung cancer and melanoma." *Cancer Res* **62**(23): 6997-7000.
- 646 Byers, L. A., L. Diao, J. Wang, P. Saintigny, L. Girard, M. Peyton, L. Shen, Y. Fan, U. Giri,  
647 P. K. Tumula, M. B. Nilsson, J. Gudikote, H. Tran, R. J. Cardnell, D. J. Bearss, S. L. Warner,  
648 J. M. Foulks, S. B. Kanner, V. Gandhi, N. Krett, S. T. Rosen, E. S. Kim, R. S. Herbst, G. R.

649 Blumenschein, J. J. Lee, S. M. Lippman, K. K. Ang, G. B. Mills, W. K. Hong, J. N. Weinstein,  
650 Wistuba, II, K. R. Coombes, J. D. Minna and J. V. Heymach (2013). "An epithelial-  
651 mesenchymal transition gene signature predicts resistance to EGFR and PI3K  
652 inhibitors and identifies Axl as a therapeutic target for overcoming EGFR inhibitor  
653 resistance." Clin Cancer Res **19**(1): 279-290.

654 Dohi, O., K. Yasui, Y. Gen, H. Takada, M. Endo, K. Tsuji, C. Konishi, N. Yamada, H.  
655 Mitsuyoshi, N. Yagi, Y. Naito, S. Tanaka, S. Arii and T. Yoshikawa (2013). "Epigenetic  
656 silencing of miR-335 and its host gene MEST in hepatocellular carcinoma." Int J Oncol  
657 **42**(2): 411-418.

658 Elkabets, M., E. Pazarentzos, D. Juric, Q. Sheng, R. A. Pelosof, S. Brook, A. O. Benzaken,  
659 J. Rodon, N. Morse, J. J. Yan, M. Liu, R. Das, Y. Chen, A. Tam, H. Wang, J. Liang, J. M.  
660 Gurski, D. A. Kerr, R. Rosell, C. Teixido, A. Huang, R. A. Ghossein, N. Rosen, T. G. Bivona,  
661 M. Scaltriti and J. Baselga (2015). "AXL mediates resistance to PI3K $\alpha$  inhibition  
662 by activating the EGFR/PKC/mTOR axis in head and neck and esophageal squamous  
663 cell carcinomas." Cancer Cell **27**(4): 533-546.

664 Engelman, J. A., T. Mukohara, K. Zejnullahu, E. Lifshits, A. M. Borrás, C. M. Gale, G. N.  
665 Naumov, B. Y. Yeap, E. Jarrell, J. Sun, S. Tracy, X. Zhao, J. V. Heymach, B. E. Johnson, L.  
666 C. Cantley and P. A. Janne (2006). "Allelic dilution obscures detection of a biologically  
667 significant resistance mutation in EGFR-amplified lung cancer." J Clin Invest **116**(10):  
668 2695-2706.

669 Garzon, R., G. Marcucci and C. M. Croce (2010). "Targeting microRNAs in cancer:  
670 rationale, strategies and challenges." Nat Rev Drug Discov **9**(10): 775-789.

671 Ghosh, A. K., C. Secreto, J. Boysen, T. Sassoon, T. D. Shanafelt, D. Mukhopadhyay and N.  
672 E. Kay (2011). "The novel receptor tyrosine kinase Axl is constitutively active in B-  
673 cell chronic lymphocytic leukemia and acts as a docking site of nonreceptor kinases:  
674 implications for therapy." Blood **117**(6): 1928-1937.

675 Greaves, M. and C. C. Maley (2012). "Clonal evolution in cancer." Nature **481**(7381):  
676 306-313.

677 Gregory, P. A., C. P. Bracken, E. Smith, A. G. Bert, J. A. Wright, S. Roslan, M. Morris, L.  
678 Wyatt, G. Farshid, Y. Y. Lim, G. J. Lindeman, M. F. Shannon, P. A. Drew, Y. Khew-Goodall  
679 and G. J. Goodall (2011). "An autocrine TGF- $\beta$ /ZEB/miR-200 signaling network  
680 regulates establishment and maintenance of epithelial-mesenchymal transition." Mol  
681 Biol Cell **22**(10): 1686-1698.

682 Griffiths-Jones, S. (2004). "The microRNA Registry." Nucleic Acids Res **32**(Database  
683 issue): D109-111.

684 Gupta, P. B., C. M. Fillmore, G. Jiang, S. D. Shapira, K. Tao, C. Kuperwasser and E. S.  
685 Lander (2011). "Stochastic state transitions give rise to phenotypic equilibrium in  
686 populations of cancer cells." Cell **146**(4): 633-644.

687 Haber, D. A., D. W. Bell, R. Sordella, E. L. Kwak, N. Godin-Heymann, S. V. Sharma, T. J.  
688 Lynch and J. Settleman (2005). "Molecular targeted therapy of lung cancer: EGFR  
689 mutations and response to EGFR inhibitors." Cold Spring Harb Symp Quant Biol **70**:  
690 419-426.

691 Jordan, N. V., A. Bardia, B. S. Wittner, C. Benes, M. Ligorio, Y. Zheng, M. Yu, T. K.  
692 Sundaresan, J. A. Licausi, R. Desai, R. M. O'Keefe, R. Y. Ebright, M. Boukhali, S. Sil, M. L.  
693 Onozato, A. J. Iafrate, R. Kapur, D. Sgroi, D. T. Ting, M. Toner, S. Ramaswamy, W. Haas,

694 S. Maheswaran and D. A. Haber (2016). "HER2 expression identifies dynamic  
695 functional states within circulating breast cancer cells." *Nature* **537**(7618): 102-106.  
696 Kabraji, S., X. Sole, Y. Huang, C. Bango, M. Bowden, A. Bardia, D. Sgroi, M. Loda and S.  
697 Ramaswamy (2017). "AKT1low quiescent cancer cells persist after neoadjuvant  
698 chemotherapy in triple negative breast cancer." *Breast Cancer Res* **19**(1): 88.  
699 Kato, M., V. Dang, M. Wang, J. T. Park, S. Deshpande, S. Kadam, A. Mardiros, Y. Zhan, P.  
700 Oettgen, S. Putta, H. Yuan, L. Lanting and R. Natarajan (2013). "TGF-beta induces  
701 acetylation of chromatin and of Ets-1 to alleviate repression of miR-192 in diabetic  
702 nephropathy." *Sci Signal* **6**(278): ra43.  
703 Kent, W. J. (2002). "BLAT--the BLAST-like alignment tool." *Genome Res* **12**(4): 656-  
704 664.  
705 Lau, N. C., L. P. Lim, E. G. Weinstein and D. P. Bartel (2001). "An abundant class of tiny  
706 RNAs with probable regulatory roles in *Caenorhabditis elegans*." *Science* **294**(5543):  
707 858-862.  
708 Lee, R. C. and V. Ambros (2001). "An extensive class of small RNAs in *Caenorhabditis*  
709 *elegans*." *Science* **294**(5543): 862-864.  
710 Lewis, B. P., I. H. Shih, M. W. Jones-Rhoades, D. P. Bartel and C. B. Burge (2003).  
711 "Prediction of mammalian microRNA targets." *Cell* **115**(7): 787-798.  
712 Li, W., S. Dobbins, I. Tomlinson, R. Houlston, D. K. Pal and L. J. Strug (2015).  
713 "Prioritizing rare variants with conditional likelihood ratios." *Hum Hered* **79**(1): 5-  
714 13.  
715 Limbach, P. A., P. F. Crain and J. A. McCloskey (1994). "Summary: the modified  
716 nucleosides of RNA." *Nucleic Acids Res* **22**(12): 2183-2196.  
717 Liu, C., B. Bai, G. Skogerbo, L. Cai, W. Deng, Y. Zhang, D. Bu, Y. Zhao and R. Chen (2005).  
718 "NONCODE: an integrated knowledge database of non-coding RNAs." *Nucleic Acids*  
719 *Res* **33**(Database issue): D112-115.  
720 Lujambio, A. and M. Esteller (2007). "CpG island hypermethylation of tumor  
721 suppressor microRNAs in human cancer." *Cell Cycle* **6**(12): 1455-1459.  
722 Lynch, J., J. Fay, M. Meehan, K. Bryan, K. M. Watters, D. M. Murphy and R. L. Stallings  
723 (2012). "MiRNA-335 suppresses neuroblastoma cell invasiveness by direct targeting  
724 of multiple genes from the non-canonical TGF-beta signalling pathway."  
725 *Carcinogenesis* **33**(5): 976-985.  
726 Lynch, T. J., D. W. Bell, R. Sordella, S. Gurubhagavatula, R. A. Okimoto, B. W. Brannigan,  
727 P. L. Harris, S. M. Hasserlat, J. G. Supko, F. G. Haluska, D. N. Louis, D. C. Christiani, J.  
728 Settleman and D. A. Haber (2004). "Activating mutations in the epidermal growth  
729 factor receptor underlying responsiveness of non-small-cell lung cancer to gefitinib."  
730 *N Engl J Med* **350**(21): 2129-2139.  
731 Mark, M. R., J. Chen, R. G. Hammonds, M. Sadick and P. J. Godowsk (1996).  
732 "Characterization of Gas6, a member of the superfamily of G domain-containing  
733 proteins, as a ligand for Rse and Axl." *J Biol Chem* **271**(16): 9785-9789.  
734 Meacham, C. E. and S. J. Morrison (2013). "Tumour heterogeneity and cancer cell  
735 plasticity." *Nature* **501**(7467): 328-337.  
736 Muranen, T., L. M. Selfors, D. T. Worster, M. P. Iwanicki, L. Song, F. C. Morales, S. Gao,  
737 G. B. Mills and J. S. Brugge (2012). "Inhibition of PI3K/mTOR leads to adaptive  
738 resistance in matrix-attached cancer cells." *Cancer Cell* **21**(2): 227-239.

739 Nagata, K., K. Ohashi, T. Nakano, H. Arita, C. Zong, H. Hanafusa and K. Mizuno (1996).  
740 "Identification of the product of growth arrest-specific gene 6 as a common ligand for  
741 Axl, Sky, and Mer receptor tyrosine kinases." *J Biol Chem* **271**(47): 30022-30027.  
742 Niederst, M. J., L. V. Sequist, J. T. Poirier, C. H. Mermel, E. L. Lockerman, A. R. Garcia, R.  
743 Katayama, C. Costa, K. N. Ross, T. Moran, E. Howe, L. E. Fulton, H. E. Mulvey, L. A.  
744 Bernardo, F. Mohamoud, N. Miyoshi, P. A. VanderLaan, D. B. Costa, P. A. Janne, D. R.  
745 Borger, S. Ramaswamy, T. Shioda, A. J. Iafrate, G. Getz, C. M. Rudin, M. Mino-Kenudson  
746 and J. A. Engelman (2015). "RB loss in resistant EGFR mutant lung adenocarcinomas  
747 that transform to small-cell lung cancer." *Nat Commun* **6**: 6377.  
748 O'Bryan, J. P., R. A. Frye, P. C. Cogswell, A. Neubauer, B. Kitch, C. Prokop, R. Espinosa,  
749 3rd, M. M. Le Beau, H. S. Earp and E. T. Liu (1991). "axl, a transforming gene isolated  
750 from primary human myeloid leukemia cells, encodes a novel receptor tyrosine  
751 kinase." *Mol Cell Biol* **11**(10): 5016-5031.  
752 Paez, J. G., P. A. Janne, J. C. Lee, S. Tracy, H. Greulich, S. Gabriel, P. Herman, F. J. Kaye, N.  
753 Lindeman, T. J. Boggon, K. Naoki, H. Sasaki, Y. Fujii, M. J. Eck, W. R. Sellers, B. E. Johnson  
754 and M. Meyerson (2004). "EGFR mutations in lung cancer: correlation with clinical  
755 response to gefitinib therapy." *Science* **304**(5676): 1497-1500.  
756 Pal, D., A. Pertot, N. H. Shirole, Z. Yao, N. Anaparthi, T. Garvin, H. Cox, K. Chang, F.  
757 Rollins, J. Kendall, L. Edwards, V. A. Singh, G. C. Stone, M. C. Schatz, J. Hicks, G. J. Hannon  
758 and R. Sordella (2017). "TGF-beta reduces DNA ds-break repair mechanisms to  
759 heighten genetic diversity and adaptability of CD44+/CD24- cancer cells." *Elife* **6**.  
760 Pillai, R. N. and S. S. Ramalingam (2012). "The biology and clinical features of non-  
761 small cell lung cancers with EML4-ALK translocation." *Curr Oncol Rep* **14**(2): 105-  
762 110.  
763 Png, K. J., M. Yoshida, X. H. Zhang, W. Shu, H. Lee, A. Rimner, T. A. Chan, E. Comen, V. P.  
764 Andrade, S. W. Kim, T. A. King, C. A. Hudis, L. Norton, J. Hicks, J. Massague and S. F.  
765 Tavazoie (2011). "MicroRNA-335 inhibits tumor reinitiation and is silenced through  
766 genetic and epigenetic mechanisms in human breast cancer." *Genes Dev* **25**(3): 226-  
767 231.  
768 Polyak, K. and R. A. Weinberg (2009). "Transitions between epithelial and  
769 mesenchymal states: acquisition of malignant and stem cell traits." *Nat Rev Cancer*  
770 **9**(4): 265-273.  
771 Prasad, D., C. V. Rothlin, P. Burrola, T. Burstyn-Cohen, Q. Lu, P. Garcia de Frutos and G.  
772 Lemke (2006). "TAM receptor function in the retinal pigment epithelium." *Mol Cell*  
773 *Neurosci* **33**(1): 96-108.  
774 Rankin, E. B., K. C. Fuh, L. Castellini, K. Viswanathan, E. C. Finger, A. N. Diep, E. L.  
775 LaGory, M. S. Kariolis, A. Chan, D. Lindgren, H. Axelson, Y. R. Miao, A. J. Krieg and A. J.  
776 Giaccia (2014). "Direct regulation of GAS6/AXL signaling by HIF promotes renal  
777 metastasis through SRC and MET." *Proc Natl Acad Sci U S A* **111**(37): 13373-13378.  
778 Samuels, Y., Z. Wang, A. Bardelli, N. Silliman, J. Ptak, S. Szabo, H. Yan, A. Gazdar, S. M.  
779 Powell, G. J. Riggins, J. K. Willson, S. Markowitz, K. W. Kinzler, B. Vogelstein and V. E.  
780 Velculescu (2004). "High frequency of mutations of the PIK3CA gene in human  
781 cancers." *Science* **304**(5670): 554.  
782 Schuler, G. D., J. A. Epstein, H. Ohkawa and J. A. Kans (1996). "Entrez: molecular  
783 biology database and retrieval system." *Methods Enzymol* **266**: 141-162.



784 Sharma, S. V., D. Y. Lee, B. Li, M. P. Quinlan, F. Takahashi, S. Maheswaran, U.  
785 McDermott, N. Azizian, L. Zou, M. A. Fischbach, K. K. Wong, K. Brandstetter, B. Wittner,  
786 S. Ramaswamy, M. Classon and J. Settleman (2010). "A chromatin-mediated  
787 reversible drug-tolerant state in cancer cell subpopulations." *Cell* **141**(1): 69-80.  
788 Shaw, A. T. and J. A. Engelman (2016). "Crizotinib Resensitization by Compound  
789 Mutation." *N Engl J Med* **374**(18): 1790-1791.  
790 Shaw, A. T., B. Y. Yeap, M. Mino-Kenudson, S. R. Digumarthy, D. B. Costa, R. S. Heist, B.  
791 Solomon, H. Stubbs, S. Admane, U. McDermott, J. Settleman, S. Kobayashi, E. J. Mark, S.  
792 J. Rodig, L. R. Chirieac, E. L. Kwak, T. J. Lynch and A. J. Iafrate (2009). "Clinical features  
793 and outcome of patients with non-small-cell lung cancer who harbor EML4-ALK." *J*  
794 *Clin Oncol* **27**(26): 4247-4253.  
795 Stephens, P., C. Hunter, G. Bignell, S. Edkins, H. Davies, J. Teague, C. Stevens, S. O'Meara,  
796 R. Smith, A. Parker, A. Barthorpe, M. Blow, L. Brackenbury, A. Butler, O. Clarke, J. Cole,  
797 E. Dicks, A. Dike, A. Drozd, K. Edwards, S. Forbes, R. Foster, K. Gray, C. Greenman, K.  
798 Halliday, K. Hills, V. Kosmidou, R. Lugg, A. Menzies, J. Perry, R. Petty, K. Raine, L.  
799 Ratford, R. Shepherd, A. Small, Y. Stephens, C. Tofts, J. Varian, S. West, S. Widaa, A.  
800 Yates, F. Brasseur, C. S. Cooper, A. M. Flanagan, M. Knowles, S. Y. Leung, D. N. Louis, L.  
801 H. Looijenga, B. Malkowicz, M. A. Pierotti, B. Teh, G. Chenevix-Trench, B. L. Weber, S.  
802 T. Yuen, G. Harris, P. Goldstraw, A. G. Nicholson, P. A. Futreal, R. Wooster and M. R.  
803 Stratton (2004). "Lung cancer: intragenic ERBB2 kinase mutations in tumours."  
804 *Nature* **431**(7008): 525-526.  
805 Tavazoie, S. F., C. Alarcon, T. Oskarsson, D. Padua, Q. Wang, P. D. Bos, W. L. Gerald and  
806 J. Massague (2008). "Endogenous human microRNAs that suppress breast cancer  
807 metastasis." *Nature* **451**(7175): 147-152.  
808 Walter, A. O., R. T. Sjin, H. J. Haringsma, K. Ohashi, J. Sun, K. Lee, A. Dubrovskiy, M.  
809 Labenski, Z. Zhu, Z. Wang, M. Sheets, T. St Martin, R. Karp, D. van Kalken, P. Chaturvedi,  
810 D. Niu, M. Nacht, R. C. Petter, W. Westlin, K. Lin, S. Jaw-Tsai, M. Raponi, T. Van Dyke, J.  
811 Etter, Z. Weaver, W. Pao, J. Singh, A. D. Simmons, T. C. Harding and A. Allen (2013).  
812 "Discovery of a mutant-selective covalent inhibitor of EGFR that overcomes T790M-  
813 mediated resistance in NSCLC." *Cancer Discov* **3**(12): 1404-1415.  
814 Wu, Q., X. Hou, J. Xia, X. Qian, L. Miele, F. H. Sarkar and Z. Wang (2013). "Emerging  
815 roles of PDGF-D in EMT progression during tumorigenesis." *Cancer Treat Rev* **39**(6):  
816 640-646.  
817 Wu, X., X. Liu, S. Koul, C. Y. Lee, Z. Zhang and B. Halmos (2014). "AXL kinase as a novel  
818 target for cancer therapy." *Oncotarget* **5**(20): 9546-9563.  
819 Yang, P., Q. J. Li, Y. Feng, Y. Zhang, G. J. Markowitz, S. Ning, Y. Deng, J. Zhao, S. Jiang, Y.  
820 Yuan, H. Y. Wang, S. Q. Cheng, D. Xie and X. F. Wang (2012). "TGF-beta-miR-34a-CCL22  
821 signaling-induced Treg cell recruitment promotes venous metastases of HBV-positive  
822 hepatocellular carcinoma." *Cancer Cell* **22**(3): 291-303.  
823 Yao, Z., S. Fenoglio, D. C. Gao, M. Camiolo, B. Stiles, T. Lindsted, M. Schleder, C. Johns,  
824 N. Altorki, V. Mittal, L. Kenner and R. Sordella (2010). "TGF-beta IL-6 axis mediates  
825 selective and adaptive mechanisms of resistance to molecular targeted therapy in  
826 lung cancer." *Proc Natl Acad Sci U S A* **107**(35): 15535-15540.  
827 Zhang, L., G. Huang, X. Li, Y. Zhang, Y. Jiang, J. Shen, J. Liu, Q. Wang, J. Zhu, X. Feng, J.  
828 Dong and C. Qian (2013). "Hypoxia induces epithelial-mesenchymal transition via

829 activation of SNAI1 by hypoxia-inducible factor -1alpha in hepatocellular carcinoma."  
830 BMC Cancer **13**: 108.  
831 Zhang, Y. X., P. G. Knyazev, Y. V. Cheburkin, K. Sharma, Y. P. Knyazev, L. Orfi, I.  
832 Szabadkai, H. Daub, G. Keri and A. Ullrich (2008). "AXL is a potential target for  
833 therapeutic intervention in breast cancer progression." Cancer Res **68**(6): 1905-  
834 1915.  
835 Zhang, Z., J. C. Lee, L. Lin, V. Olivas, V. Au, T. LaFramboise, M. Abdel-Rahman, X. Wang,  
836 A. D. Levine, J. K. Rho, Y. J. Choi, C. M. Choi, S. W. Kim, S. J. Jang, Y. S. Park, W. S. Kim, D.  
837 H. Lee, J. S. Lee, V. A. Miller, M. Arcila, M. Ladanyi, P. Moonsamy, C. Sawyers, T. J.  
838 Boggon, P. C. Ma, C. Costa, M. Taron, R. Rosell, B. Halmos and T. G. Bivona (2012).  
839 "Activation of the AXL kinase causes resistance to EGFR-targeted therapy in lung  
840 cancer." Nat Genet **44**(8): 852-860.  
841  
842

843 **FIGURE LEGENDS**

844

845 **Figure 1: AXL-positive cells are pre-existing in cell lines and tumors.**

846 **A)** Immunoblot analysis of AXL in AXL-positive cells (H1650-M3 and PC14) and AXL –ve cells  
847 (H1650 and PC9).  $\alpha$ -Tubulin is used as a loading control. **B)** Flow cytometry based analysis of  
848 surface expression of AXL in the AXL-positive cells lines (H1650-M3 and PC14) and AXL –ve  
849 cells (H1650 and PC9). Monoclonal antibody against N-terminal of AXL was used for the FACS  
850 analysis. Isotype control was used for identifying AXL-negative population. **C)** The chart  
851 represents the percentage of AXL-positive cells present in Erlotinib resistant and Erlotinib naïve  
852 cell lines. Erlotinib resistant cell lines are indicated in red, Erlotinib naïve EGFR mutant cell lines  
853 are indicated in blue, and Erlotinib naïve EGFR WT cell lines are indicated in green. Each bar  
854 represents mean  $\pm$  SD of 3 replicates from two independent experiments. **D)** The chart represents  
855 relative AXL mRNA expression in the indicated cell lines or cells sorted on the basis of surface  
856 expression of AXL. Expression in AXL-positive cells was calculated relative to its expression in  
857 AXL-negative control cells. mRNA expression was quantified by SYBR-green-based RT-qPCR.  
858 Each bar represents mean  $\pm$  SD of 3 replicates from two independent experiments. (p-value \*\*\* <  
859 0.0005, \*\*\*\* < 0.00005, unpaired t-test). **E)** The chart represents relative Gas6 mRNA expression  
860 in the indicated cell lines or cells sorted based on surface expression of AXL. Expression in AXL-  
861 positive cells was calculated relative to its expression in AXL-negative control cells. mRNA  
862 expression was quantified by SYBR-green-based RT-qPCR. Each bar represents mean  $\pm$  SD of 3  
863 replicates from two independent experiments. (p-value \* < 0.05, \*\* < 0.005, unpaired t-test). **F)** On  
864 the left panel, immunoblot analysis of AXL, GAS6, p120 RASGAP (loading control), p-AKT and  
865 AKT in AXL –ve (PC9) and AXL-positive (PC14) cells. On the right, cell extracts were  
866 immunoprecipitated with anti-AXL antibody and immunoblotted with phospho-tyrosine and AXL  
867 antibodies. Antibody heavy chain is shown as a loading control for the immunoprecipitation. **G)**  
868 The chart represents percentage of AXL-positive cells in six NSCLC patient tumors. Tumor-  
869 derived single cell suspension was stained with antibodies against CD45, CD31, EpCAM, and  
870 AXL. CD45-; CD31-; EpCAM+ cells were then FACS sorted for the AXL-positive populations.  
871 Each bar represents mean  $\pm$  SD of three technical replicates. 20,000 cells were analyzed by FACS  
872 for each replicate of each sample. Schematic of the FACS sorting is presented in Figure 1-figure  
873 supplement 2. **H)** Expression of *AXL* and *GAS6* genes in FACS-sorted AXL–negative (Blue) and  
874 AXL-positive (Red) cells from five human primary NSCLC tumors. mRNA expression was  
875 quantified by Cells to CT one step SYBR-green-based RT-qPCR. Expression of an indicated



876 mRNA in the AXL-positive cells was calculated relative to its expression in AXL-negative cells  
877 from the respective tumor. Each dot represents mean  $\pm$  SD of three replicates.

878

879 **Figure 1-figure supplement 1: FACS sorting algorithm utilized to sort human tumors**

880 Single cell suspensions generated from resected primary NSCLC were stained with antibodies  
881 against CD45, CD31, EpCAM and AXL. CD45-; CD31-; EpCAM+ cells were then FACS sorted  
882 according to the immune types AXL -ve and AXL-positive (shown in red). Isotype controls were  
883 used to determine negative populations for each antibody staining.

884

885 **Figure 2: Pre-existing AXL-positive cells have characteristics of Erlotinib resistant cells.**

886 **A)** The chart represents the number of viable cells in PC9, PC14 and AXL-positive cells sorted  
887 from PC9 upon treatment with indicated doses of Erlotinib. Values are normalized relative to  
888 vehicle treated cell (control). Cells were grown for 120 hours in the presence of drug; the number  
889 of cells were estimated upon staining with the crystal violet, de-staining in 100  $\mu$ l of 10% acetic  
890 acid and reading absorbance at 590 nm. Diamonds and black bars represent single point  
891 measurements and the mean respectively (n=6); (p-value \* < 0.05, \*\* < 0.005, \*\*\* < 0.0005,  
892 unpaired t-test). **B)** AXL-positive cells are characterized by mesenchymal features such as increase  
893 in stress fibers. AXL-negative and AXL-positive cells sorted from PC9 were stained F-actin with  
894 Phalloidin (green). DAPI (blue) was used as a counter-stain. **C)** The charts represent relative  
895 expression of the indicated mesenchymal signature genes in H1650, H1650-M3 and cells sorted on  
896 the basis of surface expression of AXL from H1650 and PC9. Expression of an indicated mRNA  
897 in the AXL-positive cells was calculated relative to its expression in AXL-negative control cells  
898 mRNA expression was quantified by SYBR-green-based RT-qPCR. Each bar represents mean  $\pm$   
899 SD of 3 replicates from two independent experiments. (p-value \* < 0.05, \*\* < 0.005, \*\*\* < 0.0005,  
900 \*\*\*\* < 0.00005, unpaired t-test). **D)** Expression of mesenchymal signature genes *VIM*, *TWIST* and  
901 *ZEB1* in FACS-sorted AXL-negative (Blue) and AXL-positive (Red) cells from five human  
902 primary NSCLC tumors. mRNA expression was quantified by Cells to CT one step SYBR-green-  
903 based RT-qPCR. Expression of an indicated mRNA in the AXL-positive cells was calculated  
904 relative to its expression in AXL-negative cells from the respective tumor. Each dot represents  
905 mean  $\pm$  SD of three replicates.

906

907 **Figure 2-figure supplement 1: Pre-existing AXL-positive cells have characteristics of Erlotinib**  
908 **resistant cells. A) and B)** Pre-existent AXL-positive cells preferentially persist during drug  
909 treatment. The charts represent the percentage of viable cells in the indicated populations upon

910 treatment with Erlotinib (0,5  $\mu$ M) (A) and Gefitinib (1 $\mu$ M) (B). AXL-positive cells were sorted  
911 from PC9, and stably infected with lentivirus expressing Td-Tomato. Then AXL-negative and Td-  
912 Tom AXL-positive cells were mixed in the mentioned ratio and treated with the EGFR TKIs. Please  
913 see the methods section for further details. **C)** AXL-negative and AXL-positive FACS-sorted cells  
914 from H1650; parental H1650 and erlotinib selected AXL-positive H1650-M3 cells; PC9 and  
915 erlotinib selected AXL-positive PC14 cells were stained with Phalloidin (green) to highlight stress  
916 fibers. DAPI (blue) was used as a counter-stain. **D)** The chart represents relative expression of the  
917 indicated mesenchymal signature genes in cells sorted based on surface expression of AXL from  
918 HCC827. Expression of an indicated mRNA in the AXL-positive cells was calculated relative to  
919 its expression in AXL-negative control cells mRNA expression was quantified by SYBR-green-  
920 based RT-qPCR. Each bar represents mean  $\pm$  SD of 3 replicates from two independent experiments.  
921 (p-value \* $<$  0.05, \*\*  $<$  0.005, \*\*\*  $<$  0.0005, \*\*\*\*  $<$  0.00005, unpaired t-test). **E)** Pharmacological  
922 inhibition of AXL leads to significant mesenchymal to epithelial transition specifically in AXL-  
923 positive cells. The charts represent expression of E-cadherin and Vimentin in AXL-positive  
924 (H1650-M3) cells and AXL-negative (H1650) cells upon treating with the AXL inhibitor BMS-  
925 777607 at the indicated concentration. mRNA expression was quantified by SYBR-green-based  
926 RT-qPCR. Each bar represents mean  $\pm$  SD of 3 replicates from two independent experiments. (p-  
927 value \* $<$  0.05, unpaired t-test). ns = non-significant.

928

929 **Figure 2-figure supplement 2: AXL-positive cells are a unique cell population.**

930 **A)** The table summarizes the molecular characteristics of the indicated panel of NSCLC cell lines.  
931 **B)** The cells were stained with antibodies against E-cadherin (RED) and Vimentin (Green) to verify  
932 their epithelial or mesenchymal cell state. DAPI (blue) was used as a counter-stain. **C)** Flow  
933 cytometry based analysis of surface expression of AXL in the panel of NSCLC cell lines to  
934 determine the percentage of pre-existing AXL-positive cells. Monoclonal antibody against N-  
935 terminal of AXL was used for the FACS analysis. Isotype control was used for identifying AXL-  
936 negative population. Isotype control was used for identifying AXL-negative population (not  
937 shown).

938

939 **Figure 3: AXL-positive cells are generated stochastically.**

940 **A)** If AXL-positive cells (red) were generated as a consequence of genetic mutations, single-cell  
941 derived clones will have different percentages of AXL-positive cells. **B)** On the other hand, if AXL-  
942 positive cells were generated stochastically, then an equal percentage of AXL-positive cells will be  
943 present in both parental and single cell derived isogenic clones. **C)** and **D)** The charts represent the

944 percentage of AXL-positive cells in the parental and single cell derived clonal populations in  
945 H1650 and HCC827 respectively. Cells were stained for surface expression of AXL, followed by  
946 flow cytometry analysis. Each bar represents mean  $\pm$  SD of three technical replicates from two  
947 independent experiments. 20,000 cells were analyzed by FACS for each replicate of each sample.  
948 **E)** AXL negative (Blue) and AXL-positive (Red) cells were sorted from H1650 cell line and were  
949 grown for 18 weeks. The percentage of AXL-positive cells emerging in each population was  
950 measured weekly, and represented as dots in the chart. The red dotted line represents the percentage  
951 of AXL-positive cells that were present in the total H1650 parent cell line. **F)** AXL -ve (Blue) and  
952 AXL-positive (Red) cells were sorted from single cell derived clonal cell line from H1650 (H1650  
953 Clone 2), and were grown for 18 weeks. The percentage of AXL-positive cells emerging in each  
954 population was measured weekly, and represented as dots in the chart. The red dotted line  
955 represents the percentage of AXL-positive cells that were present in the total H1650 clone 2 cell  
956 line.

957

958 **Figure 3-figure supplement 1: Parental cell lines and single cell derived clonal cell lines**  
959 **(H1650 and HCC827) are highly similar from a molecular standpoint.** The charts represent the  
960 mRNA expression of AXL and key mesenchymal genes in the parental and single cell derived  
961 clonal cell lines (H1650 and HCC827).

962

963 **Figure 4: miRNA profiling reveals a distinct signature that characterize the AXL-positive**  
964 **cell-state.**

965 **A) and B)** The bubble charts show miRNAs that were  $>2$  fold upregulated or  $>2$  fold downregulated  
966 in AXL-positive (H1650-M3) cells relative to the parental AXL-negative (H1650) cells. Small  
967 RNA libraries were generated from each cell line and sequenced using an Illumina platform. The  
968 size of the bubble represents the abundance of the miRNA. **C)** Heat map depicts patterns of miRNA  
969 expression in AXL-negative (H1650) and AXL-positive (H1650-M3) cells, validated by  
970 quantitative stem-loop RT-PCR. Columns indicate relative expression changes compared to U6  
971 snRNA. Each square represents the average of 3 independent measurements.  $p$ -value  $\leq 0.0001$ ,  
972 unpaired t-test. **D)** miR-335 targets are increasingly expressed in AXL-positive cells. The heat map  
973 on the left shows changes in mRNA expression of miR-335 targets in AXL-negative (H1650) and  
974 AXL-positive (H1650-M3) cells. Each column represents changes in mRNAs expression relative  
975 to Actin. Each square represents the average of 3 independent measurements.  $p$ -value  $\leq 0.0001$ ,  
976 unpaired t-test. **E)** The chart represents expression of miR-335 normalized to SNORA66 in the  
977 indicated cell lines. miRNA expression was quantified by ExiLENT SYBR-green-based RT-qPCR.

978 Each bar represents mean  $\pm$  SD of 3 replicates from two independent experiments. (p-value \*  
979 0.05, unpaired t-test). **F)** The chart represents expression of miR-335 normalized to SNORA66 in  
980 AXL -ve (Blue) and AXL-positive (Red) cells sorted from H1650 and HCC827 cell lines. miRNA  
981 expression was quantified by ExiLENT SYBR-green-based RT-qPCR. Each bar represents mean  
982  $\pm$  SD of 3 replicates from two independent experiments. (p-value \* $<$  0.05, unpaired t-test). **G)** The  
983 chart represents expression of miR-335 normalized to SNORA66 in AXL -ve (Blue) and AXL-  
984 positive (Red) cells sorted from four human primary NSCLC tumors. miRNA expression was  
985 quantified by ExiLENT SYBR-green-based RT-qPCR. Each dot represents mean  $\pm$  SD of 3  
986 replicates. **H)** The chart represents expression of the indicated miRNAs normalized to SNORA66  
987 in AXL -ve H1650 cells treated with Vehicle (Blue) or TGF-beta (Red). The data are presented as  
988 relative to vehicle treated control. miRNA expression was quantified by ExiLENT SYBR-green-  
989 based RT-qPCR. Each bar represents mean  $\pm$  SD of 3 replicates from two independent experiments.  
990 (p-value \* $<$  0.05, \*\* $<$  0.005, paired t-test). ns= non-significant. **I)** The chart represents expression  
991 of the indicated miRNAs normalized to SNORA66 in AXL-positive H1650-M3 cells treated with  
992 Vehicle (Red) or TGFbRI inhibitor LY2157299, Selleckchem (Red). The data are presented as  
993 relative to vehicle treated control. miRNA expression was quantified by ExiLENT SYBR-green-  
994 based RT-qPCR. Each bar represents mean  $\pm$  SD of 3 replicates from two independent experiments.  
995 (p-value \* $<$  0.05, \*\* $<$  0.005, \*\*\* $<$  0.005 paired t-test). ns= non-significant. **H)** The chart represents  
996 expression of the indicated miRNAs normalized to SNORA66 in AXL -ve H1650 cells treated  
997 with Scramble LNA (Blue) or miR-335 antagomir (Red). The data are presented as relative to  
998 scramble treated control. miRNA expression was quantified by ExiLENT SYBR-green-based RT-  
999 qPCR. Each bar represents mean  $\pm$  SD of 3 replicates from two independent experiments. (p-value  
1000 \* $<$  0.05, \*\* $<$  0.005, paired t-test).

1001

1002 **Figure 4-figure supplement 1: Inhibiting miR-335 expression results in re-expression of miR-**  
1003 **335 targets.** **A)** The Histogram shows miR-335 levels in H1650 cells upon 5 days of treatment with  
1004 three independent miR-335 antagomirs (see material section for information) in H1650 cells.  
1005 Levels of miR-335 expression are relative to SNORA66. Each bar represents mean  $\pm$  SD of 3  
1006 replicates from two independent experiments. (p-value \*\*  $<$  0.005, \*\*\*  $<$  0.0005 unpaired t-test).  
1007 **B)** Expression of miR-335 targets in H1650 cells upon treatment with miR-335 antagomirs relative  
1008 to control. Each bar represents mean  $\pm$  SD of 3 replicates from two independent experiments. (p-  
1009 value \*  $<$  0.05, \*\*  $<$  0.005, \*\*  $<$  0.0005, \*\*\*  $<$  0.00005, #  $<$  0.000005 unpaired t-test). **C)** The chart  
1010 represents the relative expression of TGF- $\beta$ 1 and 2 in AXL-negative H1650 cells treated with  
1011 scramble LNA (Blue) or miR-335 antagomir (Red). The data are presented as relative to scramble

1012 treated control. mRNA expression was quantified by SYBR-green-based RT-qPCR. Each bar  
1013 represents mean  $\pm$  SD of 3 replicates from two independent experiments. (p-value  $* < 0.05$ , paired  
1014 t-test).

1015

1016 **Figure 5: miR-335 regulates AXL-positive cell-state transition.**

1017 **A)** The chart on left represents the knockdown efficiency of miR-335 antagomir in H1650 and PC9  
1018 cells. mRNA expression was quantified by SYBR-green-based RT-qPCR and normalized to  
1019 GAPDH. Each bar represents mean  $\pm$  SD of 3 replicates from two independent experiments. (p-  
1020 value  $* < 0.05$ , unpaired t-test). **B)** The chart represents the percentage of AXL-positive cells  
1021 present in H1650 and PC9 cells upon treatment with miR-335 antagomir relative to scramble  
1022 treated control. Cells stained with antibody against N-terminal of AXL were used for FACS  
1023 analysis. Each bar represents mean  $\pm$  SD of three technical replicates. 20,000 cells were analyzed  
1024 by FACS for each replicate of each sample. (p-value  $* < 0.05$ , unpaired t-test). See Figure 5-figure  
1025 supplement 1A for representative FACS profiles. **C)** Representative images of H1650 and PC9  
1026 cells stained with Phalloidin (green) and DAPI (blue) as counterstain. Cells were treated for 5 days  
1027 with control antagomir or miR-335 antagomir. **D)** Fold change in genes that characterize the AXL-  
1028 positive cell-state upon inhibition of miR-335 in AXL -ve cell lines H1650 and PC9. mRNA  
1029 expression was quantified by SYBR-green-based RT-qPCR and normalized to actin. Each bar  
1030 represents mean  $\pm$  SD of 3 replicates from two independent experiments. (p-value  $* < 0.05$ ,  $** <$   
1031  $0.005$ ,  $*** < 0.0005$  unpaired t-test). **E)** The charts represent the number of viable cells in H1650  
1032 and **F)** PC9 cells upon transfection with miR-335 antagomir and treatment with indicated doses of  
1033 Erlotinib. Values are normalized relative to vehicle treated cell (control). Cells were grown for 120  
1034 hours in the presence of drug; the number of cells was estimated upon staining with the crystal  
1035 violet, de-staining in 100  $\mu$ l of 10% acetic acid and reading absorbance at 590 nm. Diamonds and  
1036 black bars represent single point measurements and the mean respectively (n=8); (p-value  $** <$   
1037  $0.005$ , unpaired t-test). ns = non-significant.

1038

1039 **Figure 5-figure supplement 1: Inhibiting miR-335 expression results in molecular and**  
1040 **phenotypic changes characteristic of the AXL-positive cell-state.**

1041 **A)** Flow cytometry based analysis of surface expression of AXL in PC9 and H1650 cells upon  
1042 inhibition of miR-335 with miR-335 antagomir, to determine the change in percentage of AXL-  
1043 positive cells. Monoclonal antibody against N-terminal of AXL was used for the FACS analysis.  
1044 Isotype control was used for identifying AXL-negative population. Isotype control was used for  
1045 identifying AXL-negative population (not shown).

1046

1047 **Figure 5-figure supplement 2: CRISPR-CAS9 mediated gene editing to reduce miR-335**  
1048 **expression results in molecular and phenotypic changes characteristic of the AXL-positive**  
1049 **cell-state.**

1050 **A)** The chart represents the knock down efficiency of the indicated small guide RNAs (sg. RNA)  
1051 targeting the miR-335 sequence, compared to cells receiving sg.Renilla (control). mRNA  
1052 expression was quantified by SYBR-green-based RT-qPCR. Each bar represents mean  $\pm$  SD of 3  
1053 replicates from two independent experiments. (p-value  $** < 0.005$ , paired t-test). **B)** Flow  
1054 cytometry based analysis of surface expression of AXL in H1650 cells upon editing the miR-335  
1055 sequence with three different guide RNAs, to determine the change in percentage of AXL-positive  
1056 cells. sg.RNA against Renilla is used as a control. Monoclonal antibody against N-terminal of AXL  
1057 was used for the FACS analysis. Isotype control was used for identifying AXL-negative population.  
1058 Isotype control was used for identifying AXL-negative population (not shown). **C)** The chart  
1059 represents the fold change in the mRNA expression of the indicated genes in H1650 cells containing  
1060 sg. RNAs targeting the miR-335 sequence or Renilla (control), and presented relative to Renilla  
1061 control. mRNA expression was quantified by SYBR-green-based RT-qPCR. Each bar represents  
1062 mean  $\pm$  SD of 3 replicates from two independent experiments. (p-value  $* < 0.05$ ,  $** < 0.005$ , paired  
1063 t-test).

1064

1065 **Figure 6: Methylation of MEST isoform 2 promoter modulates miR-335 expression in AXL-**  
1066 **positive cells.**

1067 **A)** Schematic of MEST locus organization; the methylation analysis by bisulfite sequencing of  
1068 MEST CpG island 1 and 2 in AXL -ve (H1650) and AXL-positive (H1650-M3) cells lines are  
1069 shown below. **B)** Semi-quantitative RT-PCR analysis of methylation status of CpG island 1 in  
1070 H1650 and H1650-M3. U: Un-methylation specific primer; M: Methylation specific primer. See  
1071 Figure 6-figure supplement 1A for relative amount of methylation of MEST CpG island 1 in the  
1072 Erlotinib naïve and resistant cell lines quantified via methylation specific SYBR-green-based RT-  
1073 qPCR (MSP). **C)** The chart represents relative amount of methylation of MEST CpG island 1 in  
1074 AXL -ve (Blue) and AXL-positive (Red) cells sorted from H1650 and PC9 cell lines. Amount of  
1075 methylation of DNA was quantified via methylation specific SYBR-green-based RT-qPCR (MSP).  
1076 Each bar represents mean  $\pm$  SD of 3 replicates from two independent experiments. (p-value  $* <$   
1077  $0.05$ , unpaired t-test). **D)** The chart represents relative amount of methylation of MEST CpG island  
1078 1 in AXL -ve (Blue) and AXL-positive (Red) cells sorted from 4 human primary NSCLC tumors.  
1079 Amount of methylation of DNA was quantified via methylation specific SYBR-green-based RT-



1080 qPCR (MSP). Each dot represents mean  $\pm$  SD of three replicates. **E-H**) Treatment of cells with 5-  
1081 aza-dC is sufficient to reduce the levels of CpG island 1 methylation, increase the expression of  
1082 miR-335 decrease AXL-positive cells and reduce Erlotinib resistance, respectively. **E**) The chart  
1083 represents the relative amount of methylation of MEST CpG island 1 in H1650 and H1650-M3  
1084 cells treated with indicated amount of 5-aza-dC. Amount of methylation of DNA was quantified  
1085 via methylation specific SYBR-green-based RT-qPCR (MSP). Each bar represents mean  $\pm$  SD of  
1086 3 replicates from two independent experiments. (p-value  $* < 0.05$ , unpaired t-test). ns = non-  
1087 significant. **F**) The chart represents the amount of miR-335 (relative to SNORA66) in H1650 and  
1088 H1650-M3 cells upon treatment with 5-aza-dC, and normalized to vehicle treated control. miRNA  
1089 expression was quantified by ExiLENT SYBR-green-based RT-qPCR. Each bar represents mean  
1090  $\pm$  SD of 3 replicates from two independent experiments. (p-value  $* < 0.05$ , unpaired t-test). ns =  
1091 non-significant. **G**) The chart represents percentage of AXL-positive cells in H1650-M3 upon  
1092 treatment with 5-aza-dC, in presence of scramble LNA (RED solid bar) or miR-335 antagomir  
1093 (dotted bar). The data is presented relative to H1650-M3 cells treated with scramble LNA at 0nM  
1094 5-aza-dC. Cells stained with antibody against N-terminal of AXL were used for FACS analysis.  
1095 Each bar represents mean  $\pm$  SD of three technical replicates. 20,000 cells were analyzed by FACS  
1096 for each replicate of each sample. (p-value  $* < 0.05$ ,  $** < 0.005$ ,  $*** < 0.05$  unpaired t-test). ns =  
1097 non-significant. See Figure 6-figure supplement 1C for the representative mRNA expression. **H**)  
1098 The chart represents the relative number of Erlotinib surviving colonies in absence of presence of  
1099 5-aza-dC. Compared to the AXL -ve cells, the AXL-positive cells have significantly higher number  
1100 of surviving colonies, that in presence of 5-aza-dC reduced. Each bar represents mean  $\pm$  SD of 3  
1101 replicates from two independent experiments. (p-value  $* < 0.05$ , unpaired t-test). ns = non-  
1102 significant.

1103

1104 **Figure 6-figure supplement 1: A)** The chart represents relative amount of methylation of MEST  
1105 CpG island 1 in the H1650, H1650-M3, PC9 and PC14 cell lines. Amount of methylation of DNA  
1106 was quantified via methylation specific SYBR-green-based RT-qPCR (MSP). Each bar represents  
1107 mean  $\pm$  SD of 3 replicates from two independent experiments. (p-value  $* < 0.05$ , unpaired t-test).  
1108 **B)** The chart represents relative amount of methylation of MEST CpG island 1 in AXL -ve (Blue)  
1109 and AXL-positive (Red) cells sorted from HCC827 and A549 cell lines. Amount of methylation of  
1110 DNA was quantified via methylation specific SYBR-green-based RT-qPCR (MSP). Each bar  
1111 represents mean  $\pm$  SD of 3 replicates from two independent experiments. (p-value  $* < 0.05$ ,  
1112 unpaired t-test). **C)** The chart represents relative expression of AXL mRNA in H1650-M3 upon  
1113 treatment with 5-aza-dC, in presence of scramble LNA (RED solid bar) or miR-335 antagomir

1114 (dotted bar). The data is presented relative to H1650-M3 cells treated with scramble LNA at 0nM  
1115 5-aza-dC. mRNA expression was quantified by SYBR-green-based RT-qPCR. Each bar represents  
1116 mean  $\pm$  SD of 3 replicates from two independent experiments. (p-value \* < 0.05, \*\* < 0.005, \*\*\*  
1117 < 0.0005, unpaired t-test). ns= non-significant. **D**) The chart represents percentage of AXL-positive  
1118 cells in AXL -ve cells (Blue) and AXL-positive cells (Red) sorted from H1650 upon treatment  
1119 with 5-aza-dC. (p-value \*\* < 0.005, unpaired t-test). ns= non-significant.

1120

1121 **Figure 7:** Cancer cells can transit between an epithelial state characterized by low expression of  
1122 AXL and a mesenchymal-like state with high AXL expression. AXL-positive cells have increased  
1123 resistance to EGFR TKi compared to AXL-negative cells. The transition between these two states  
1124 is restricted by miR-335 whose expression is regulated epigenetically through promoter methylation.  
1125 The existence of this innate stochastic/epigenetic mechanism has important therapeutic  
1126 implications. Upon treatment with EGFR TKi, AXL-positive cells can survive but differently from  
1127 cells that have acquired resistance through genetic mutations with time they can revert to an  
1128 epithelial EGFR TKi sensitive state.



**A**

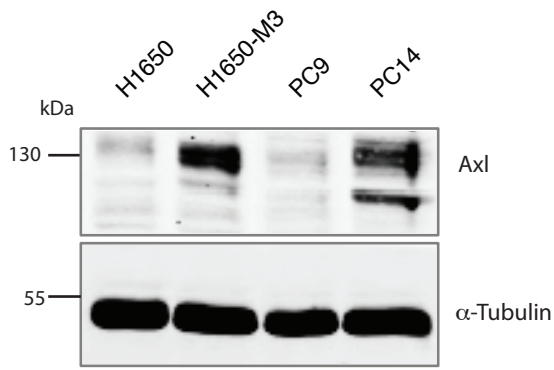

**B**

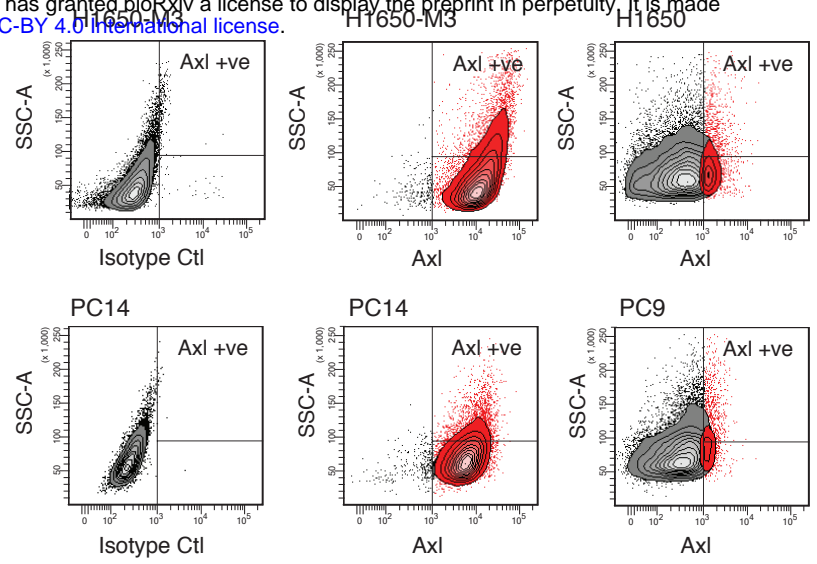

**C**

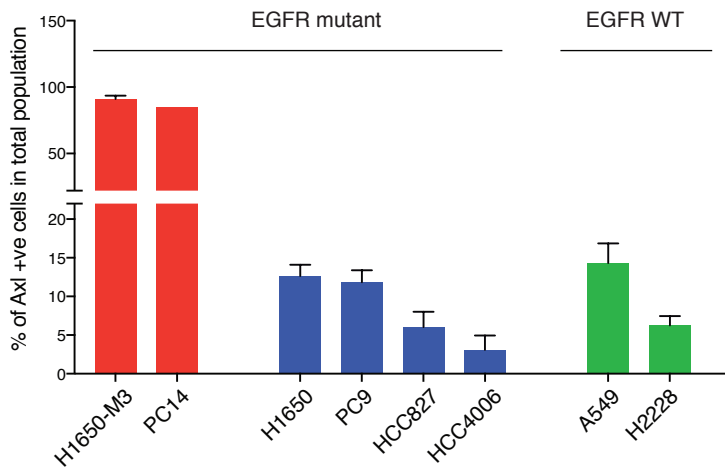

**D**

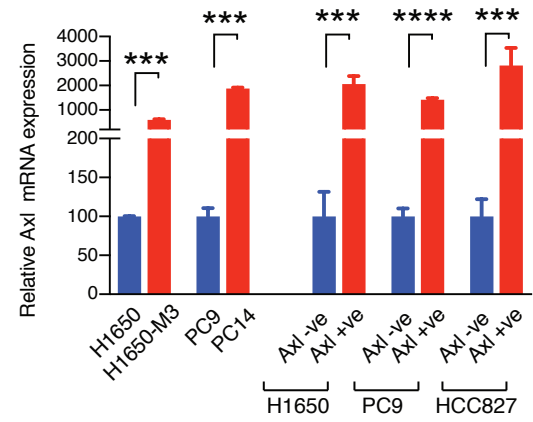

**E**

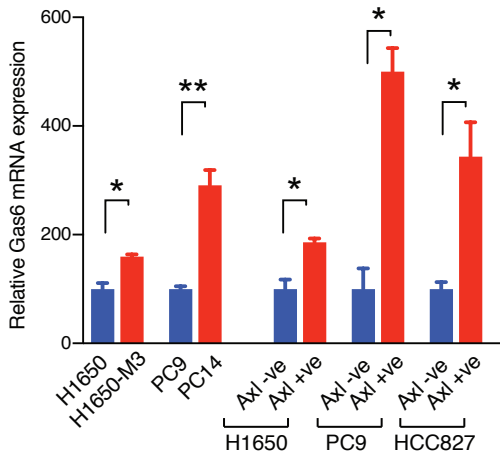

**F**

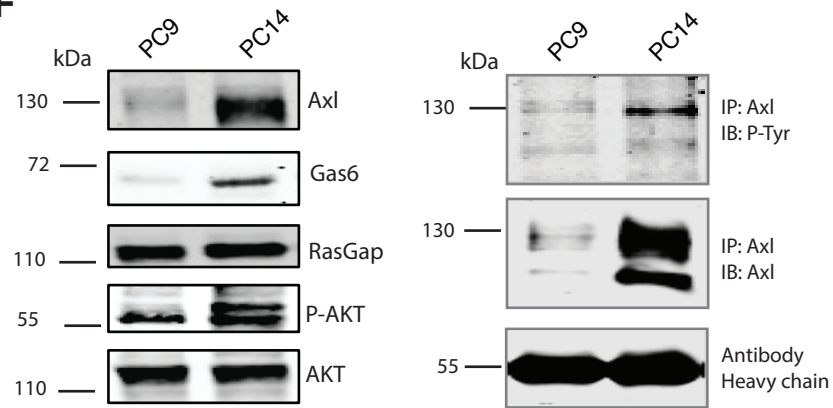

**G**

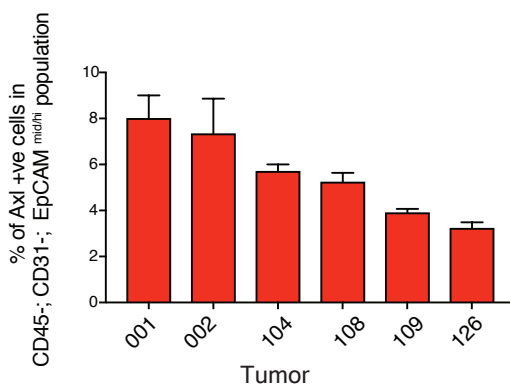

**H**

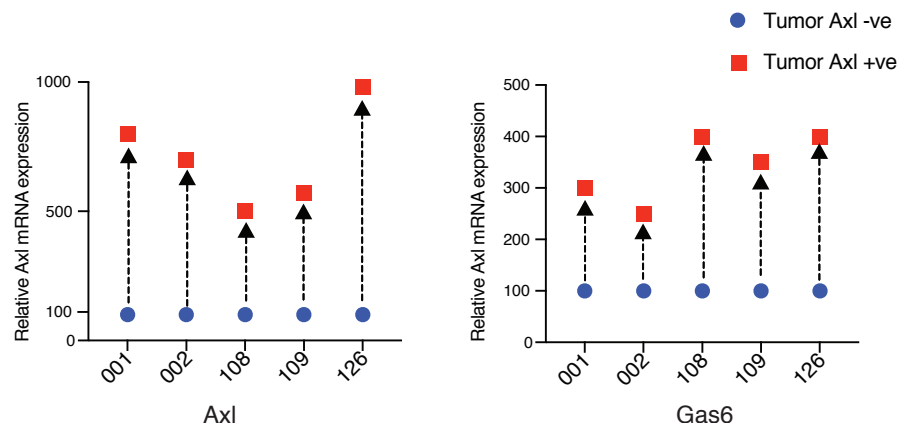

**Figure 1**

**A**

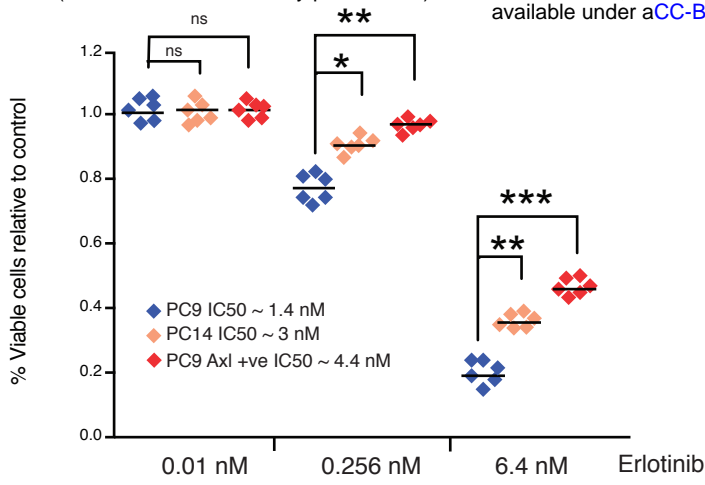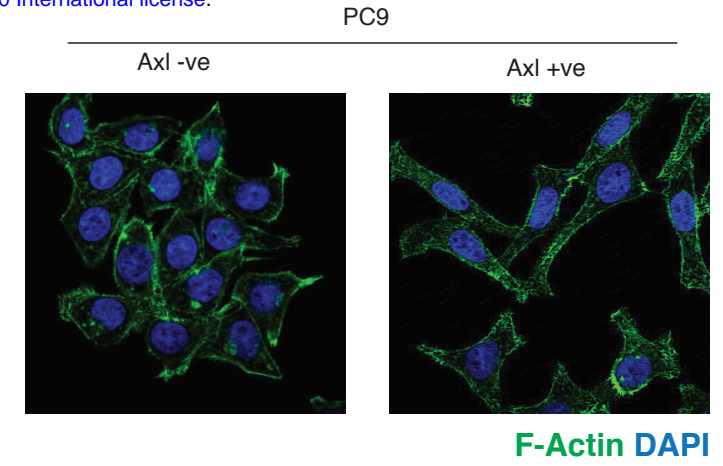

**C**

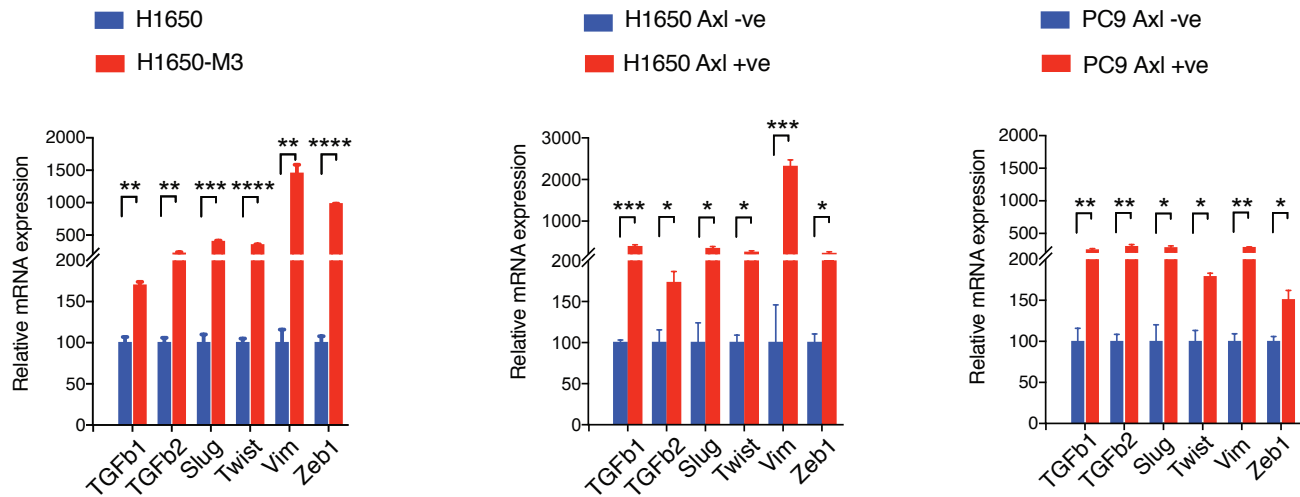

**D**

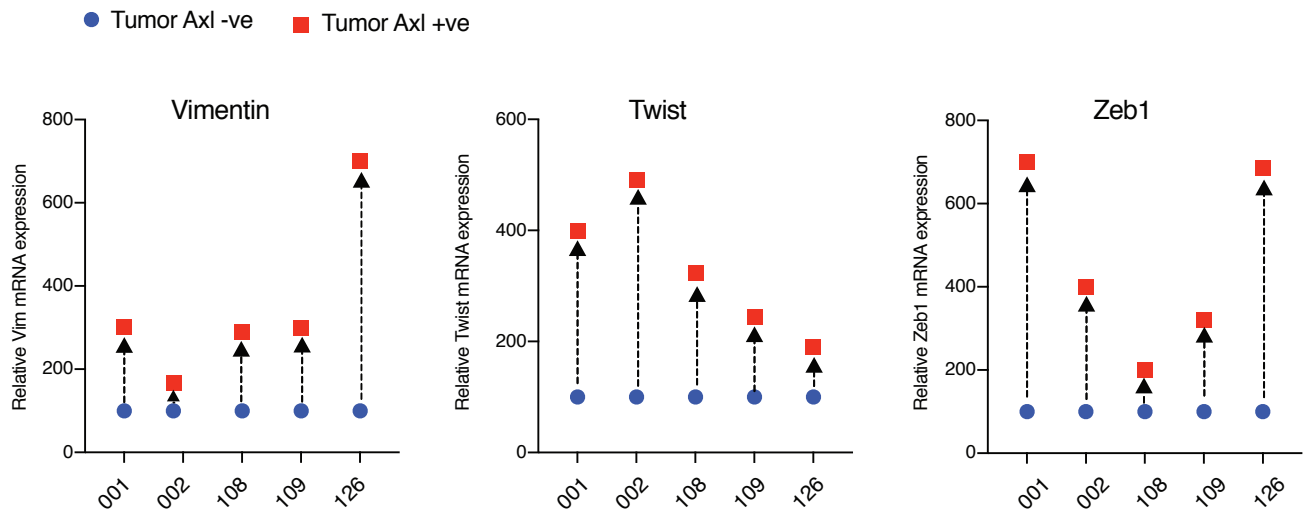

**Figure 2**

**A Genetic Mutation Mechanism**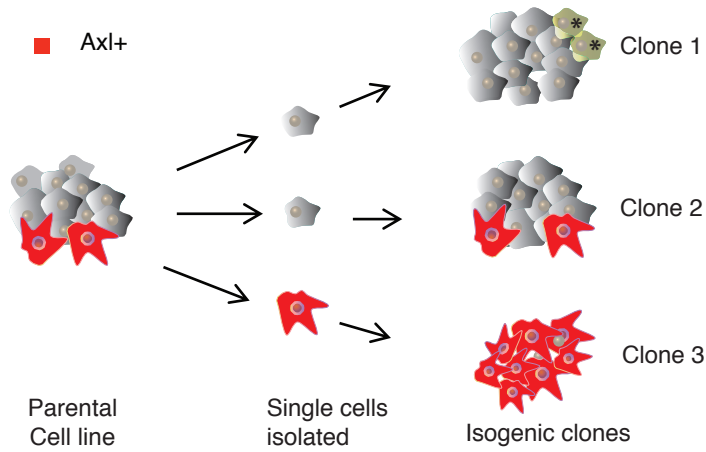**B Epigenetic/ Stochastic Mechanism**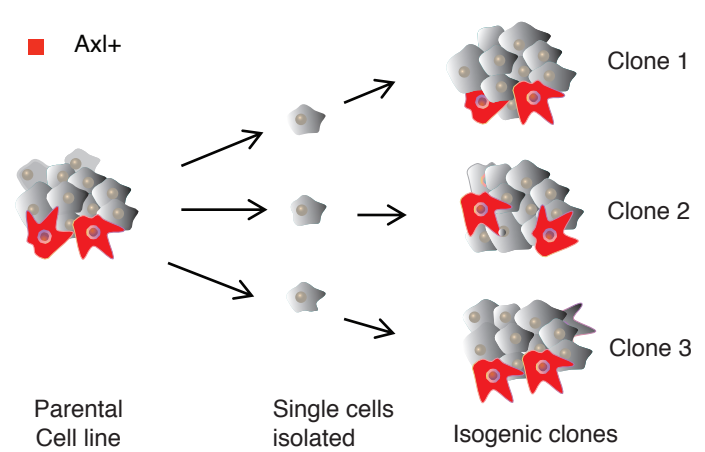**C H1650**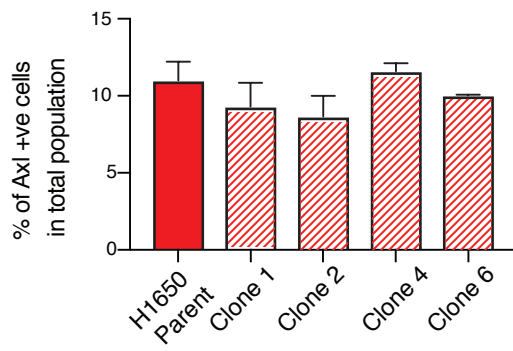**D HCC827**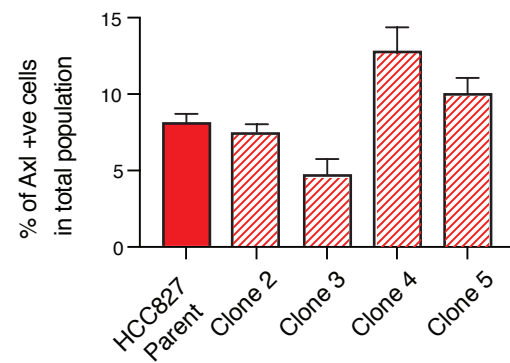**E H1650 Parent**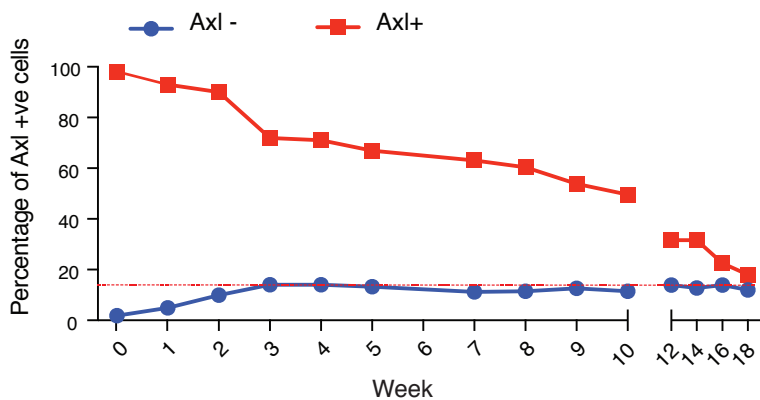**F H1650 Clone 2**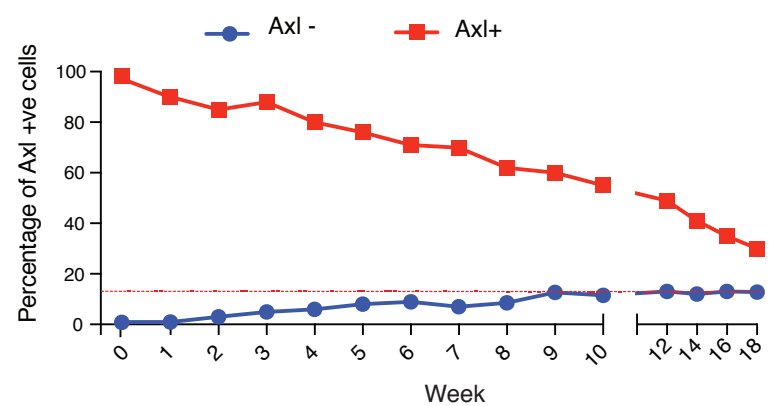**Figure 3**

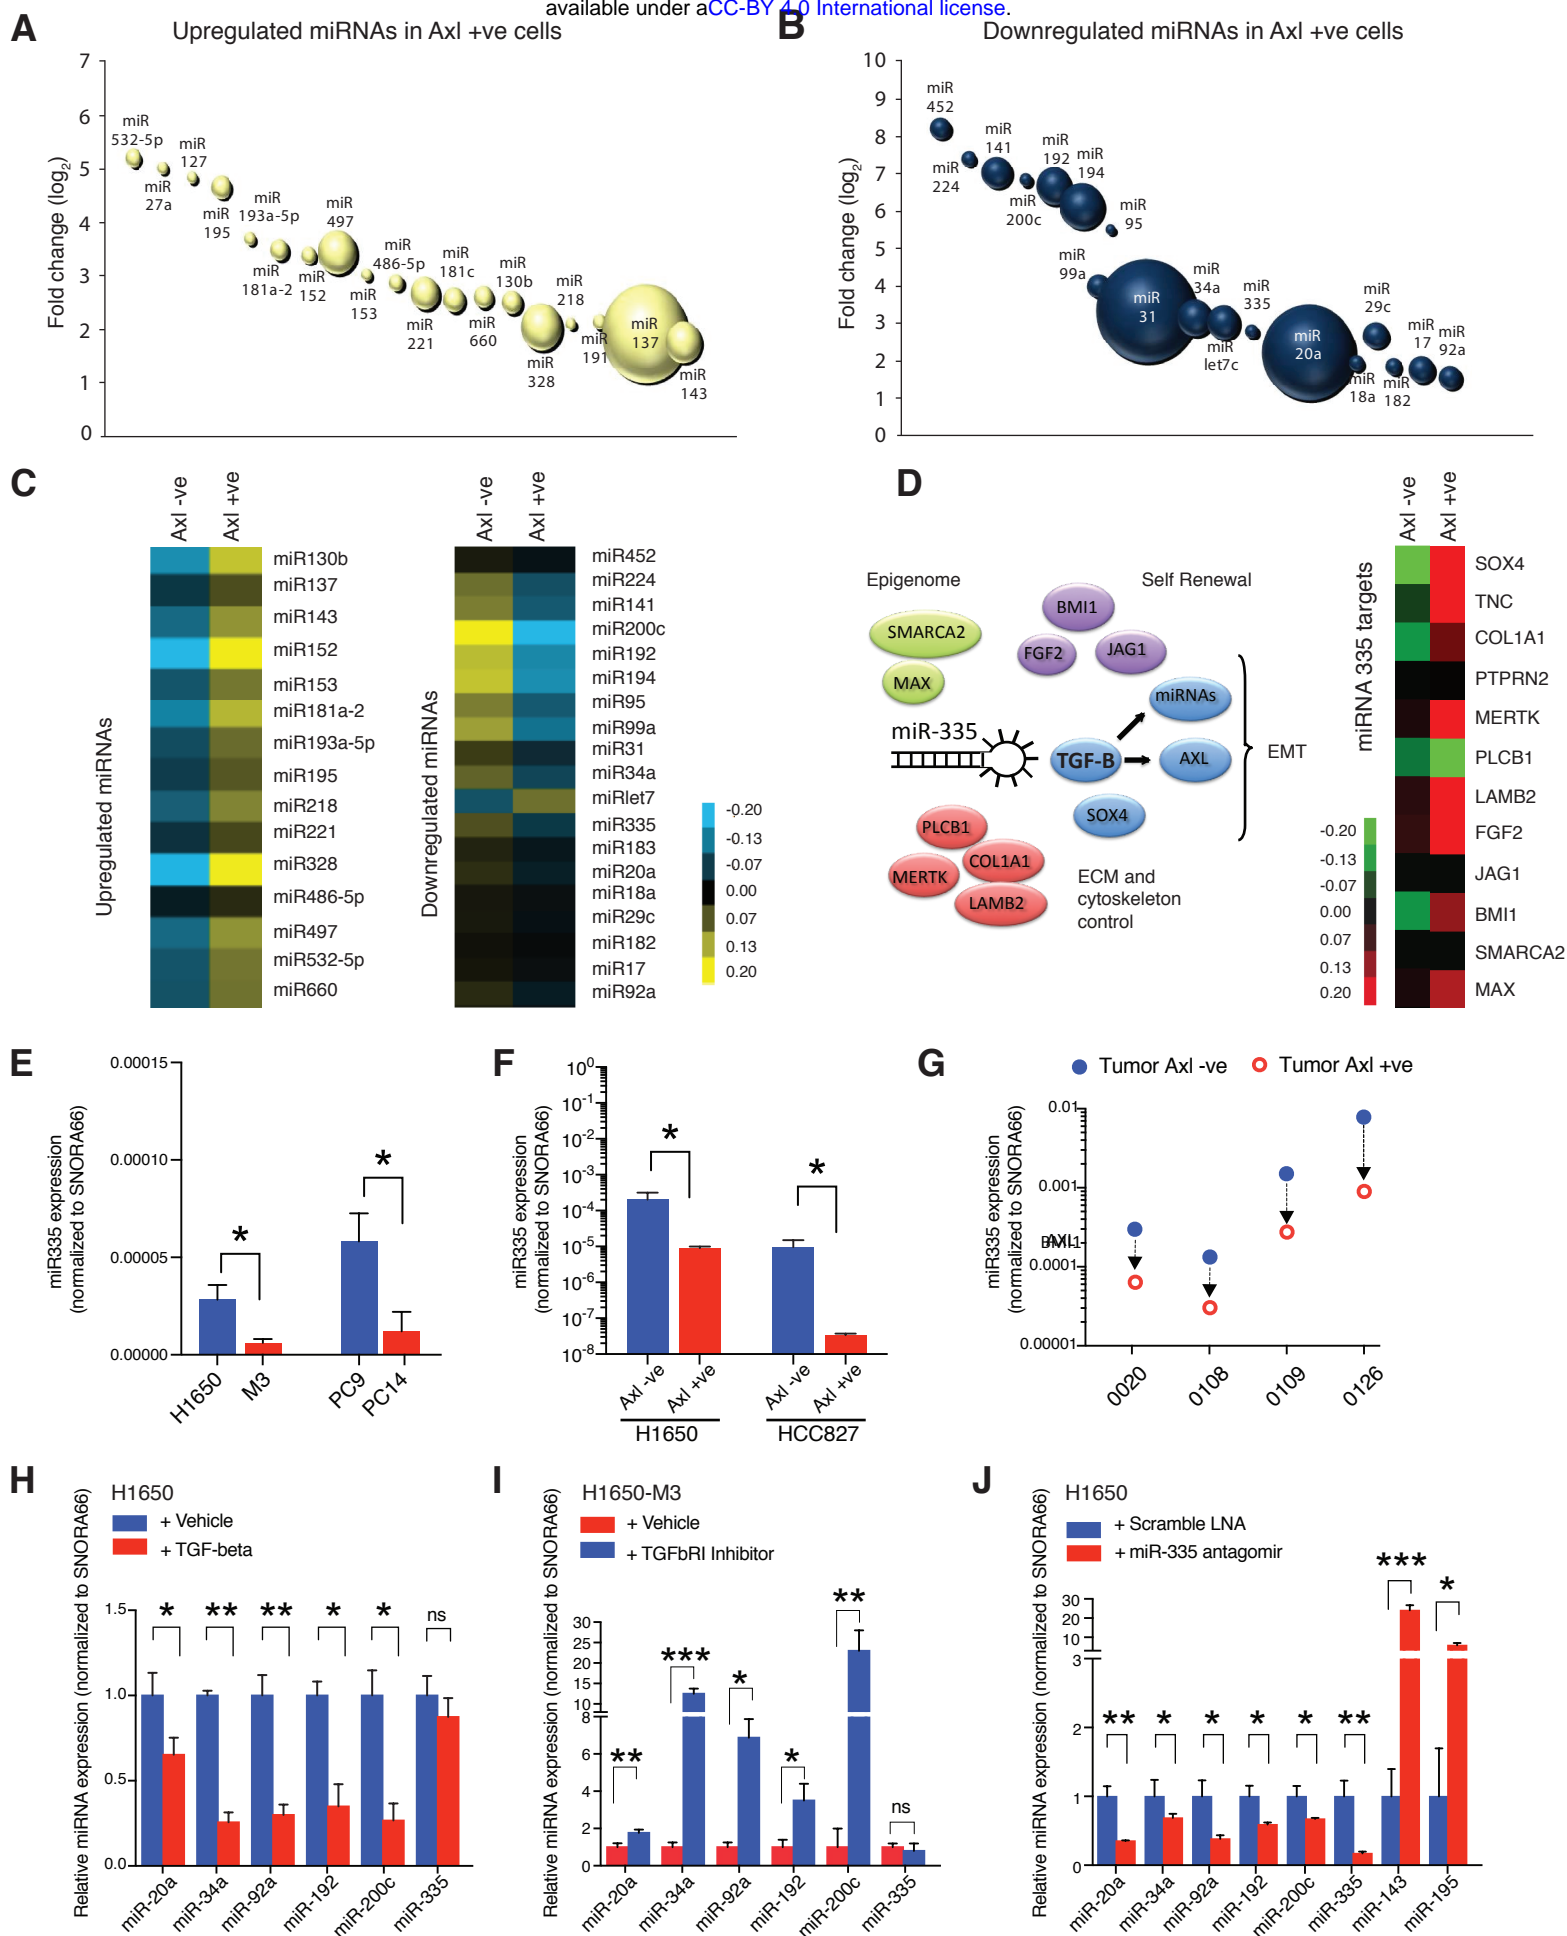

**Figure 4**

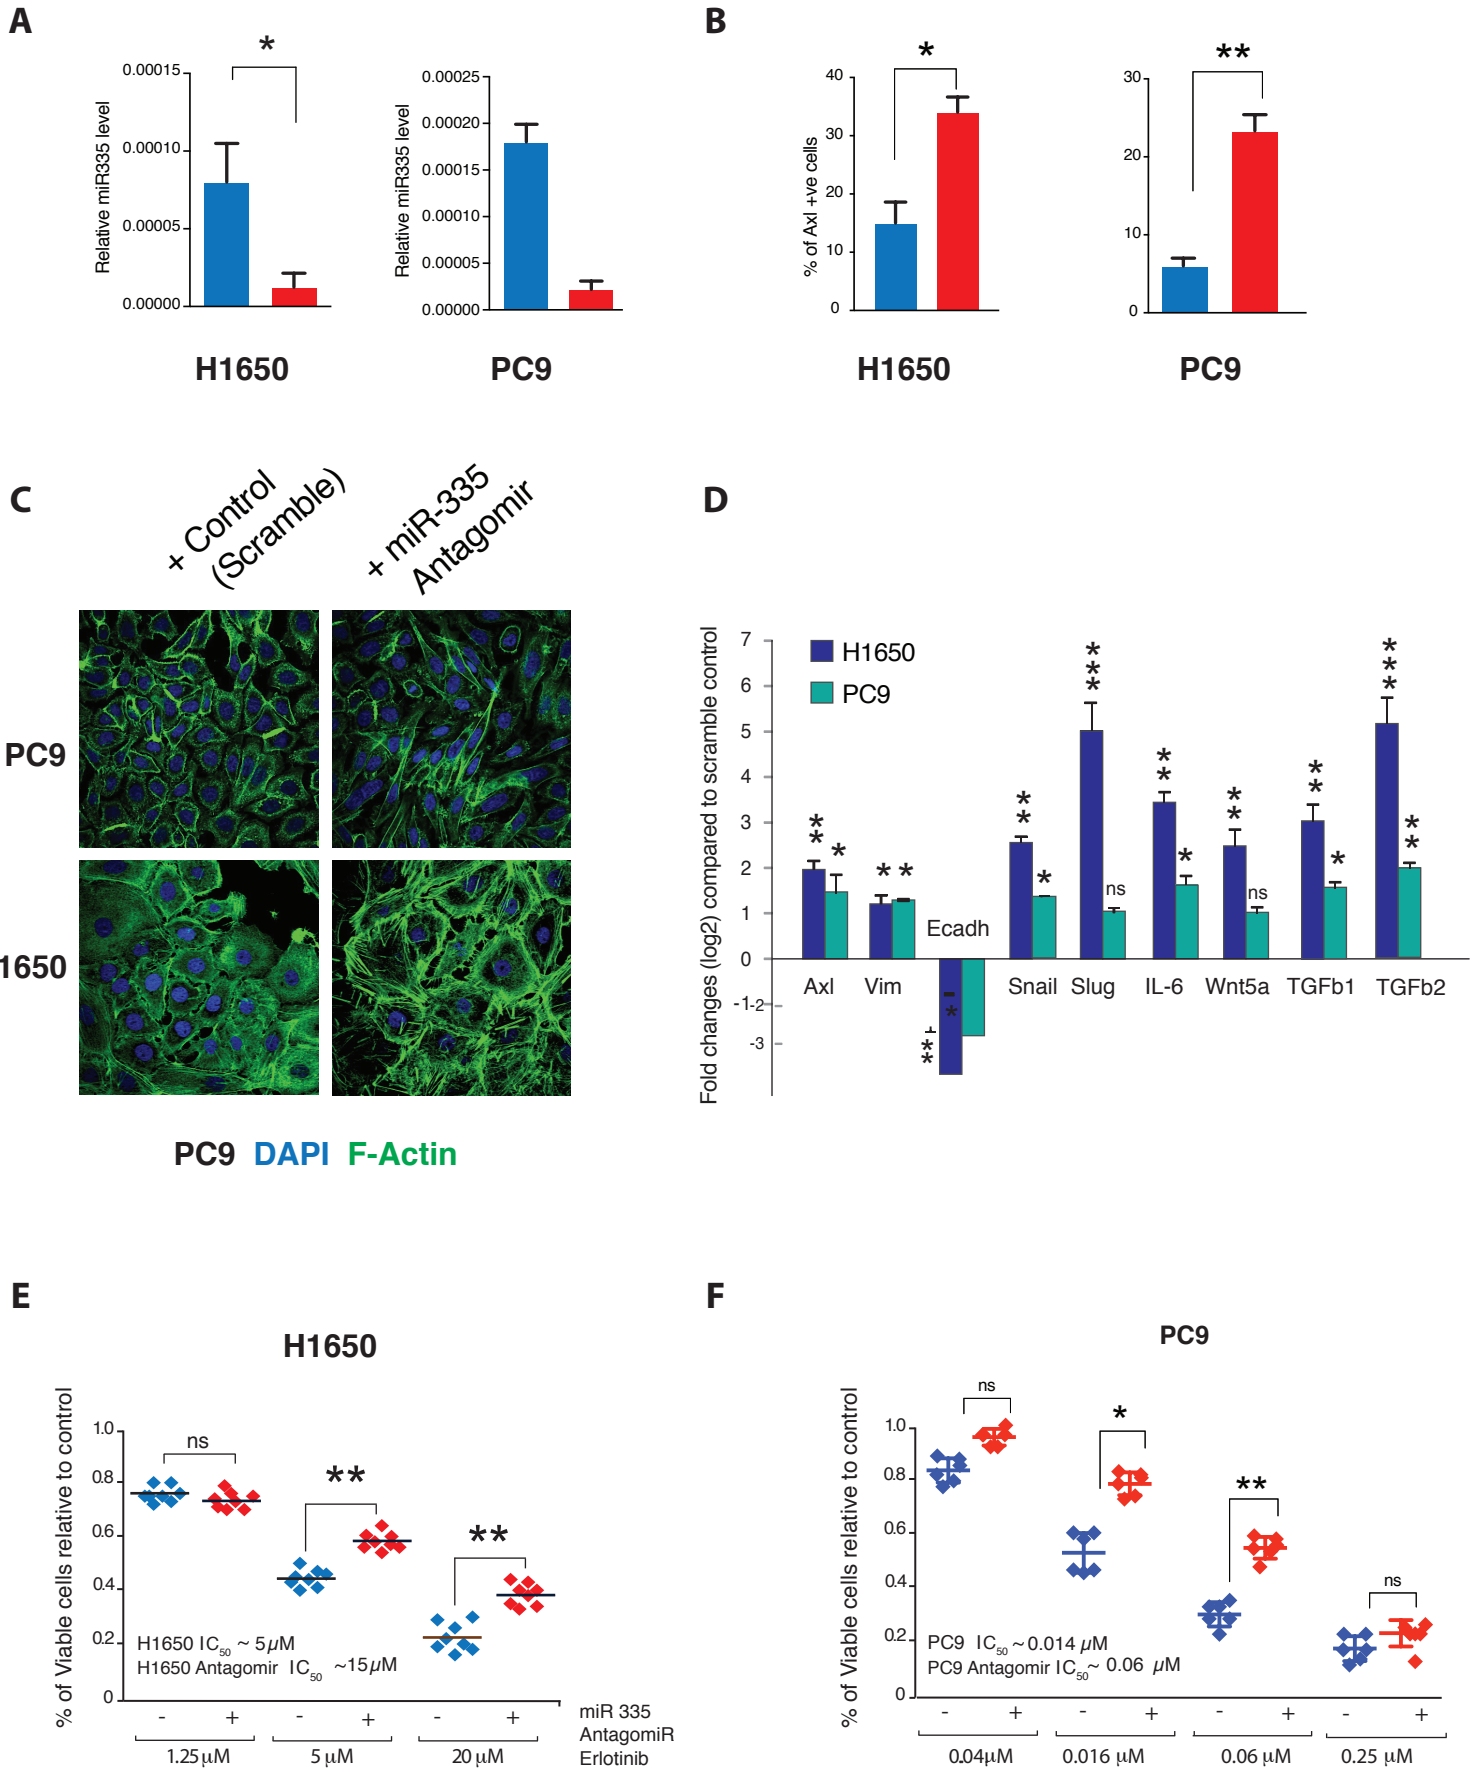

Figure 5

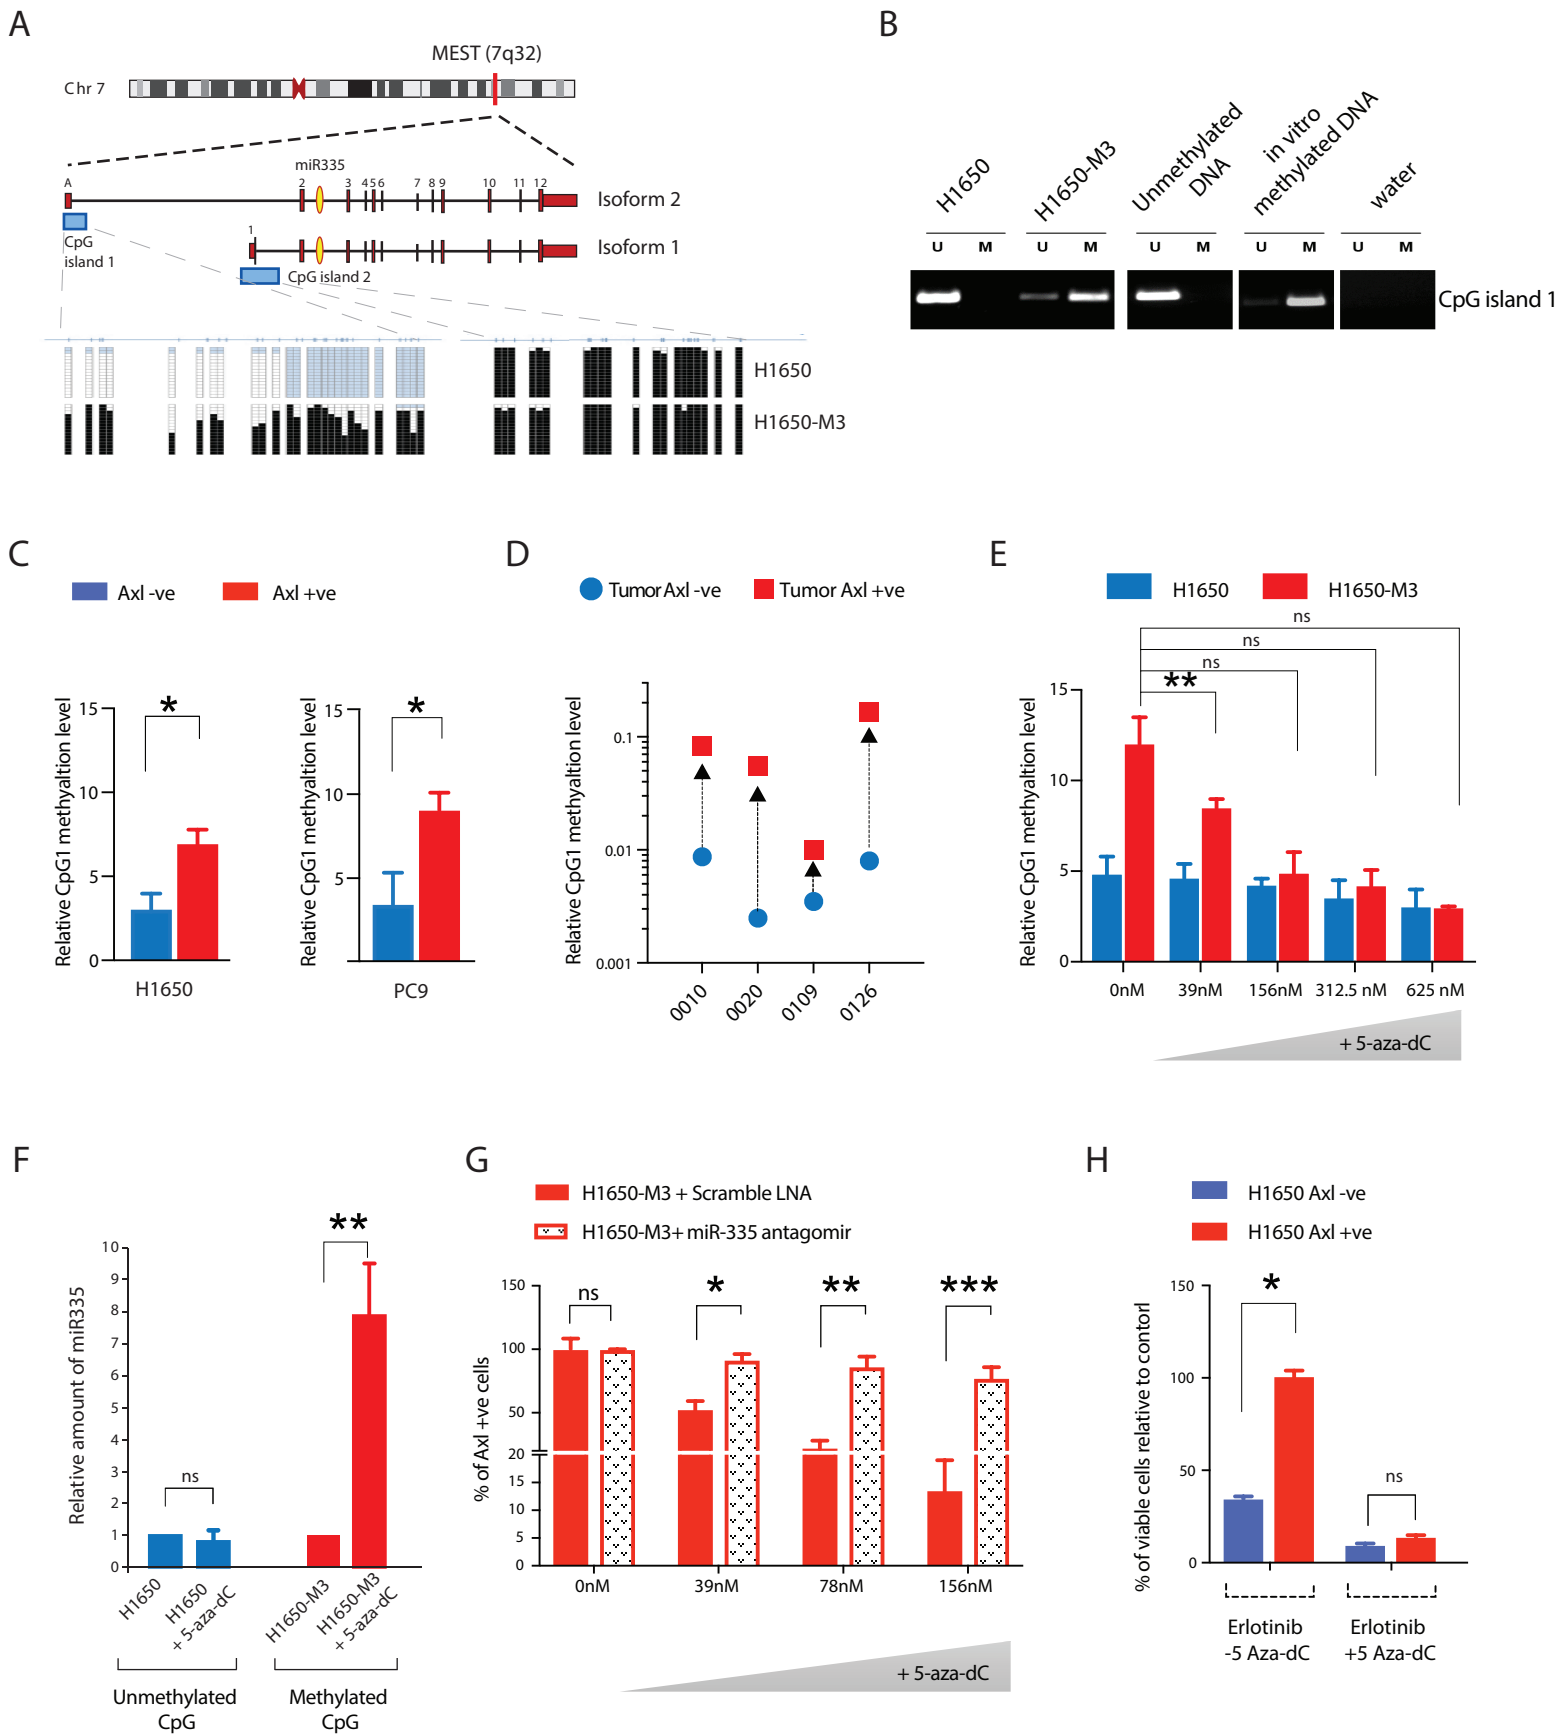

Figure 6



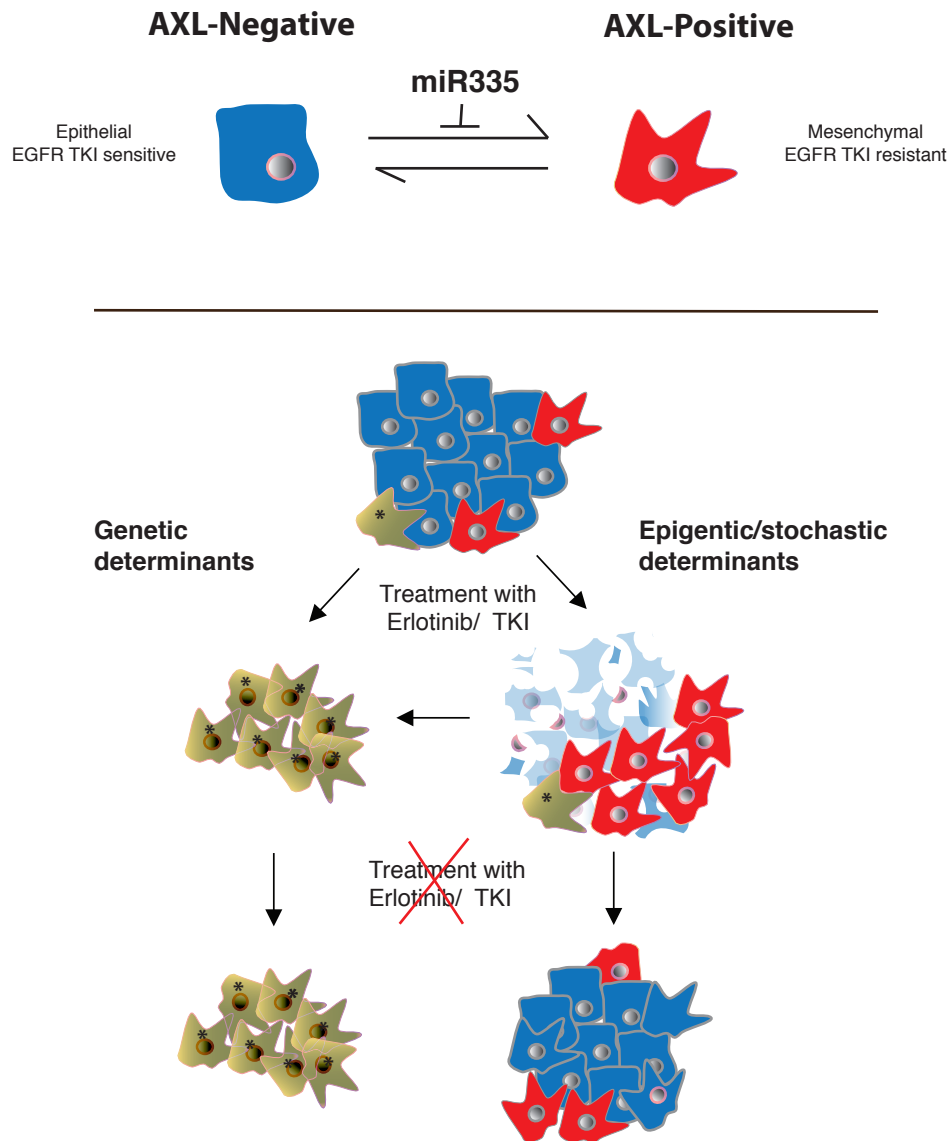

Figure 7

**A**

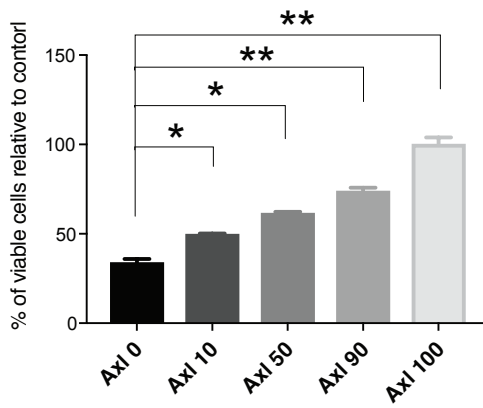

**B**

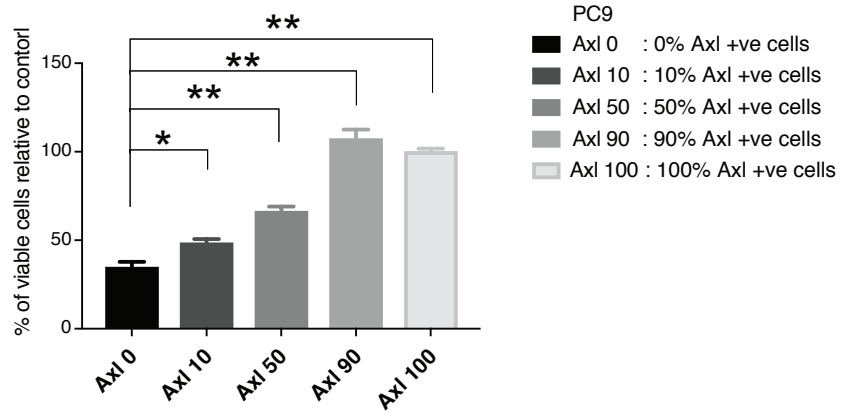

**C**

F-Actin DAPI

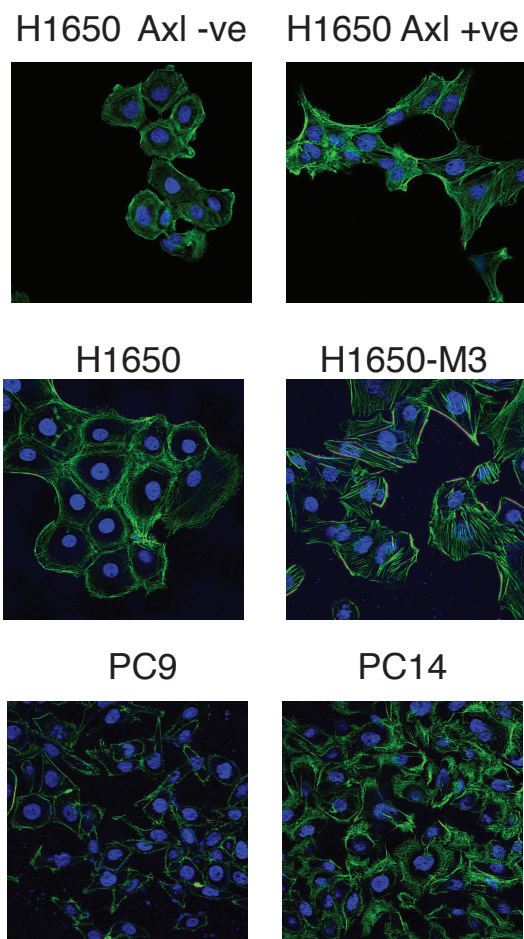

**D**

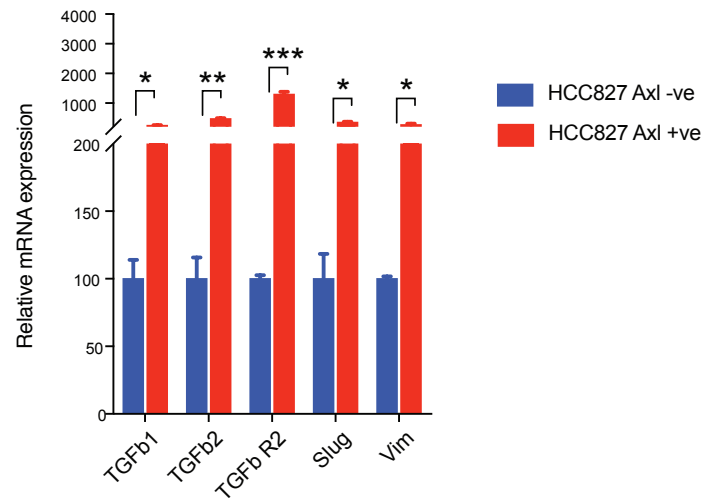

**E**

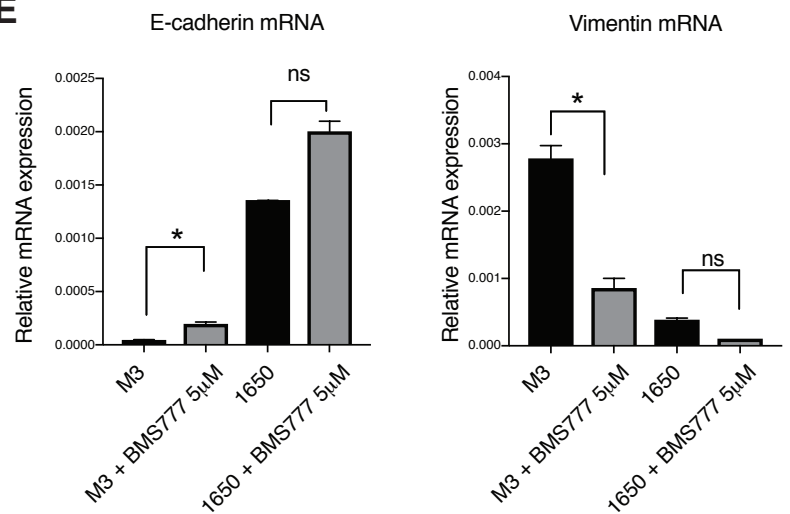

Figure 2-figure supplement 1

**A**

| Cell Line | EGFR activating Mutations | Another mutation/ driver oncogene | Phenotype    |
|-----------|---------------------------|-----------------------------------|--------------|
| H1650     | delE746-A750              |                                   | Epithelial   |
| A549      | WT                        | KRAS G12S                         | Epithelial   |
| PC9       | delE746-A750              |                                   | Intermediate |
| H23       | WT                        |                                   | Mesenchymal  |
| H1650-M3  | delE746-A750              |                                   | Mesenchymal  |
| H1703     | WT                        | PDGFR overexpression              | Mesenchymal  |
| H1975     | L858R/ T790M              |                                   | Mesenchymal  |

**B**

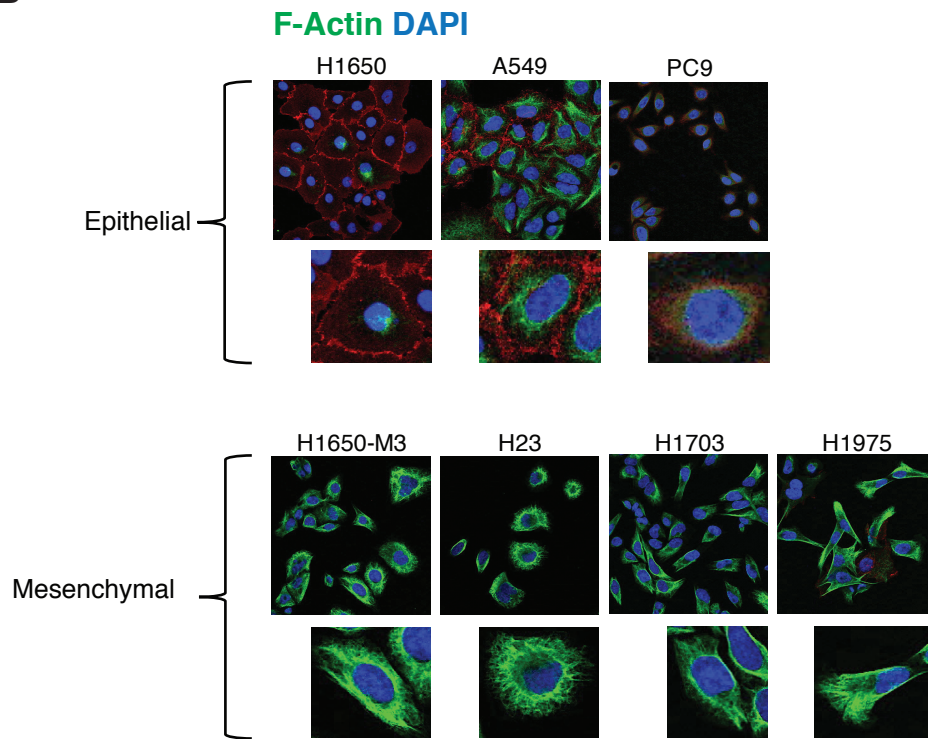

**C**

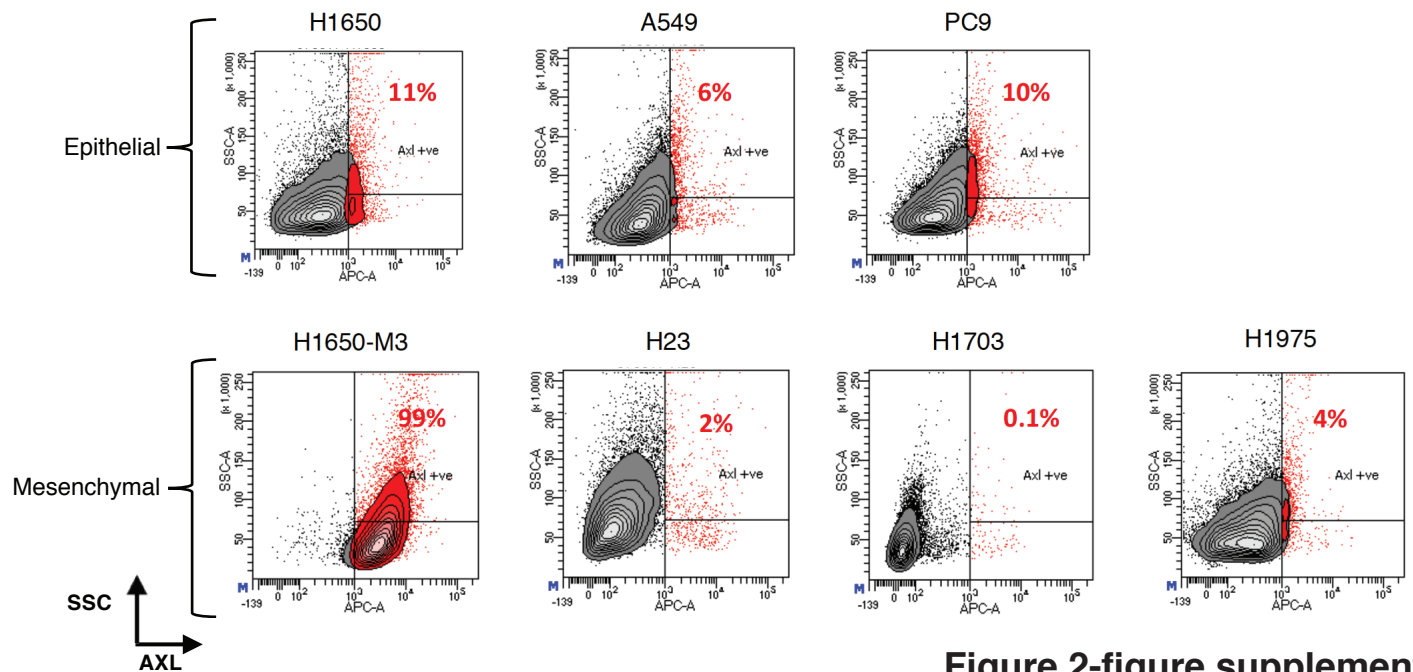

**Figure 2-figure supplement 2**

**A**

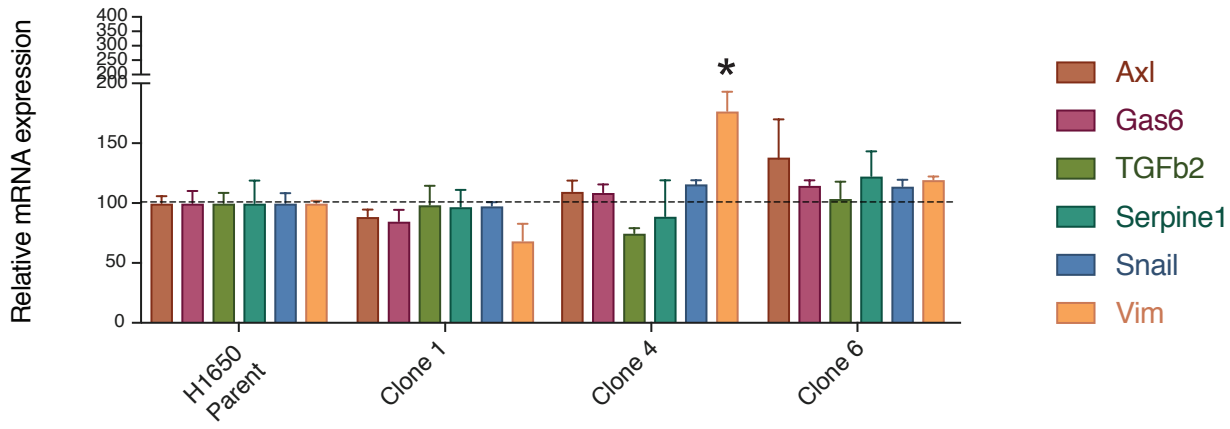

**B**

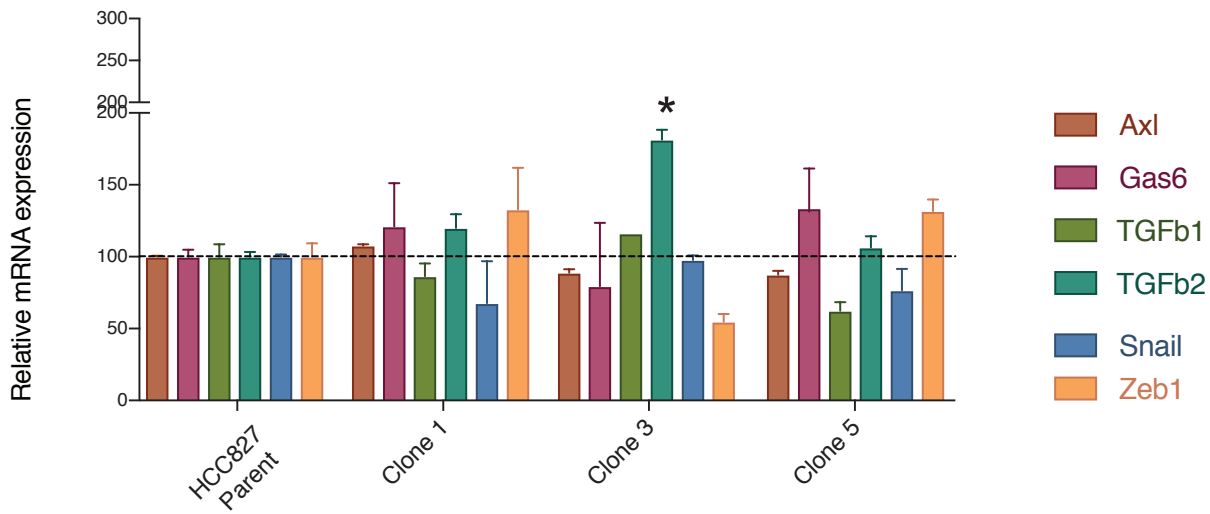

**Figure 3-figure supplement 1**

**A**

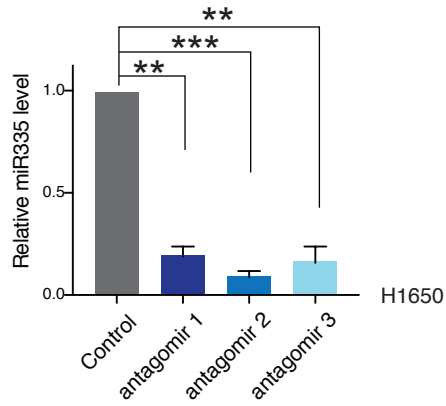

**B**

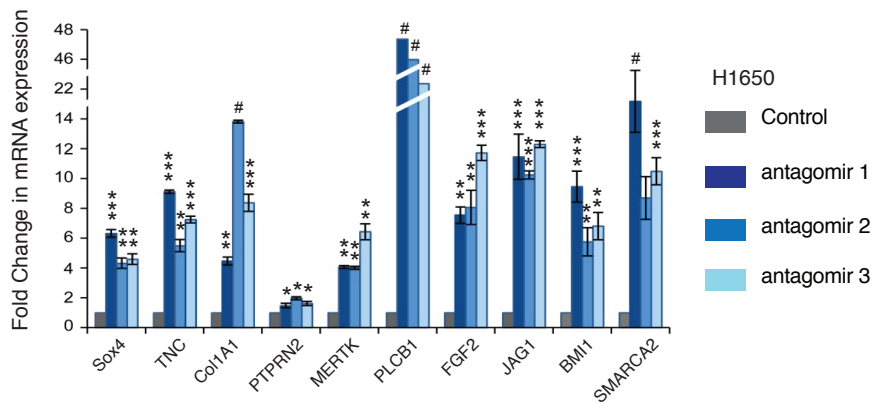

**C**

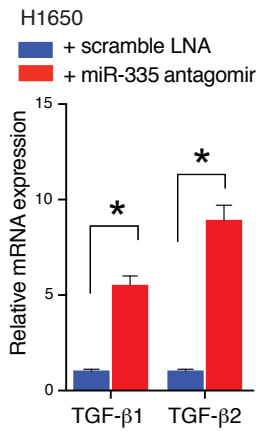

## A FACS profile for 1650 and pc9 + LNA

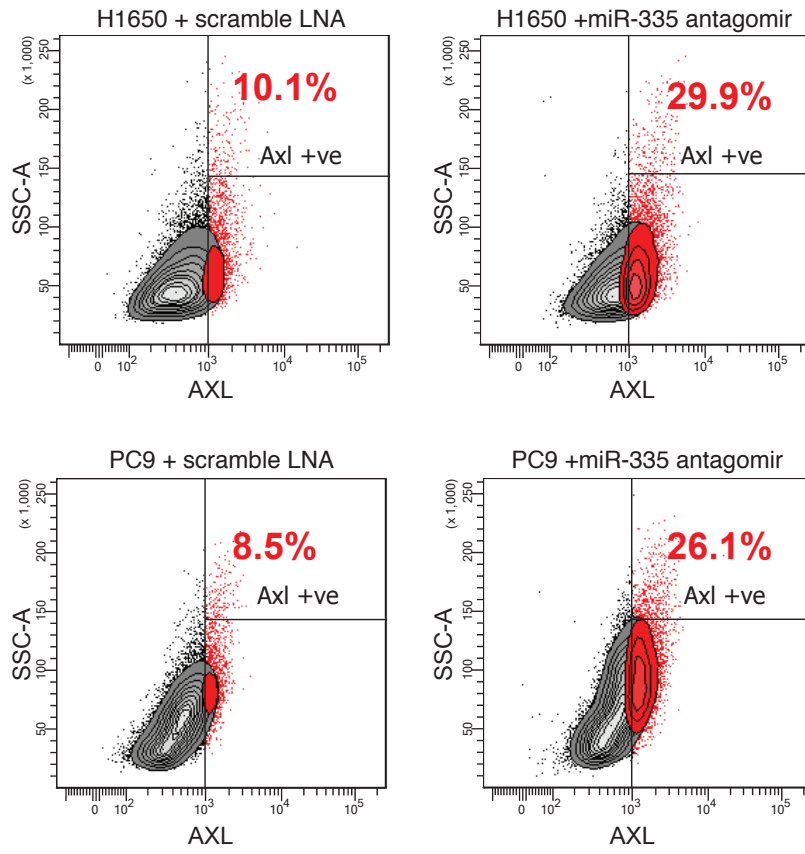

Figure 5-figure supplement 1



**A**

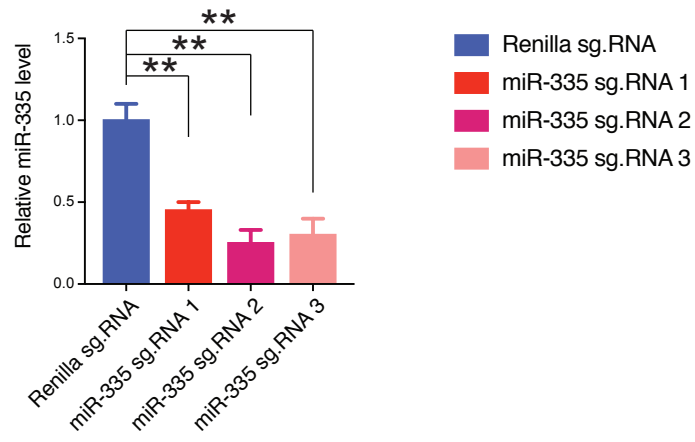

**B**

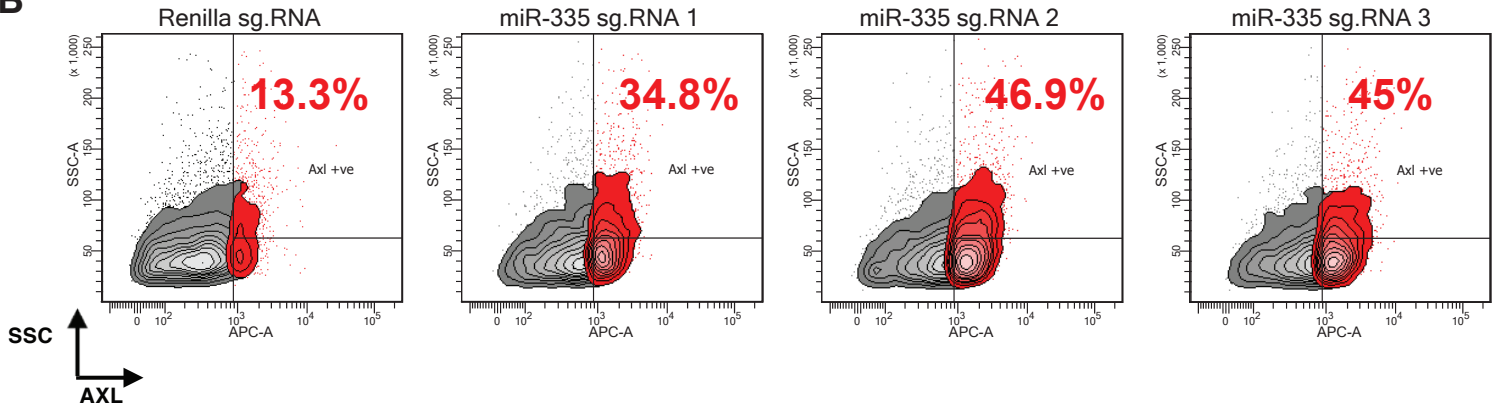

**C**

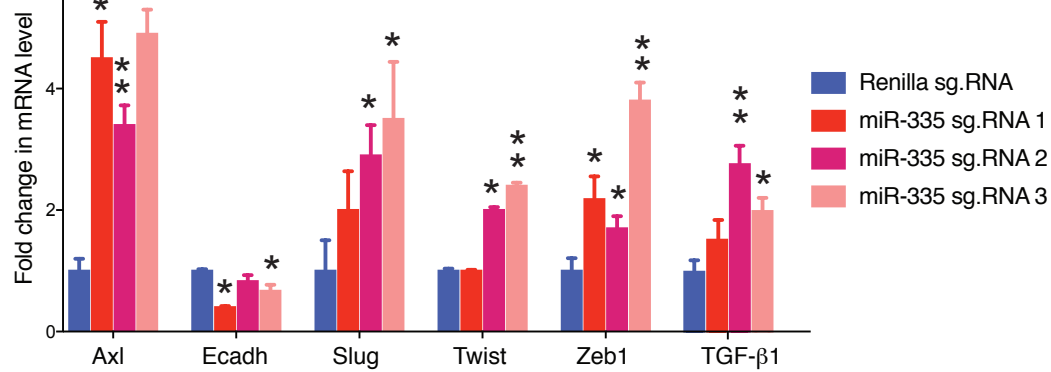

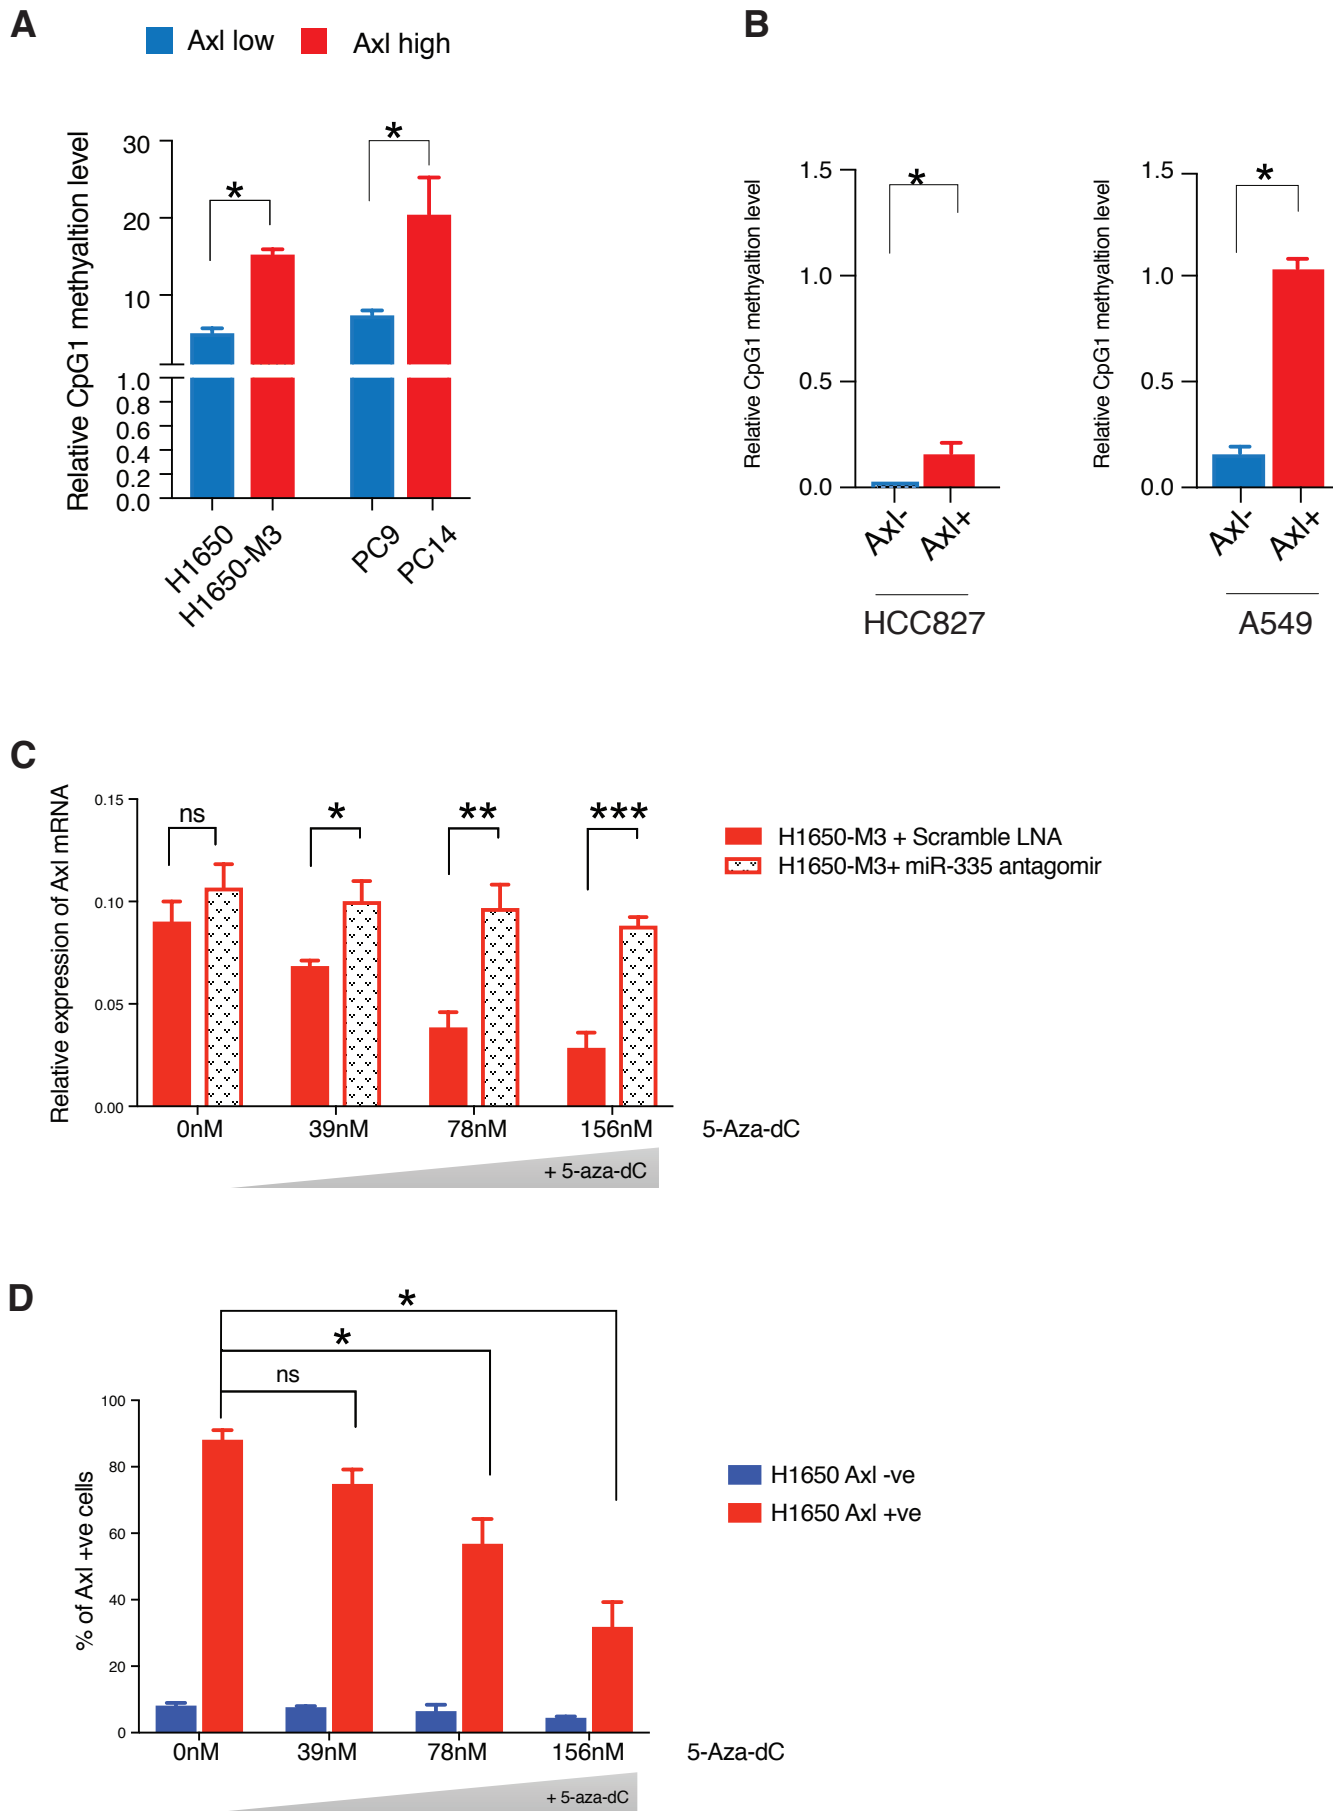

Figure 6-figure supplement 1
